# Supplementary material for: Transcription/Replication Conflicts in Tumorigenesis and Their Potential Role as Novel Therapeutic Targets in Multiple Myeloma
Source: MDPI journal article supplement (doi:10.3390/cancers13153755), 2021-07-27
Supplement: s1 [file s1]

# Supplementary Materials: Transcription/Replication Conflicts in Tumorigenesis and Their Potential Role as Novel Therapeutic Targets in Multiple Myeloma

Laure Dutrieux, Yea-Lih Lin, Malik Lutzmann, Raphaël Rodriguez, Michel Cogné, Philippe Pasero and Jérôme Moreaux

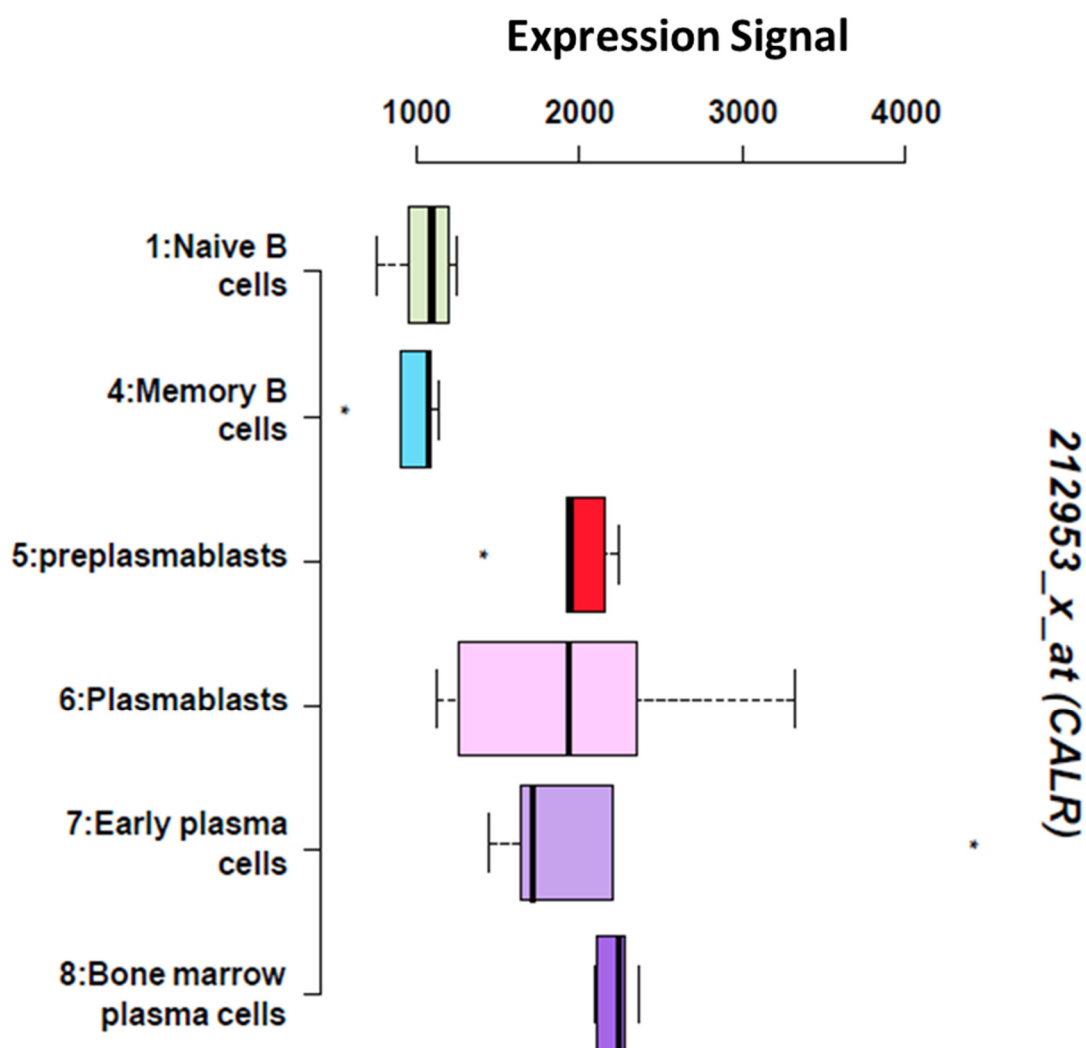

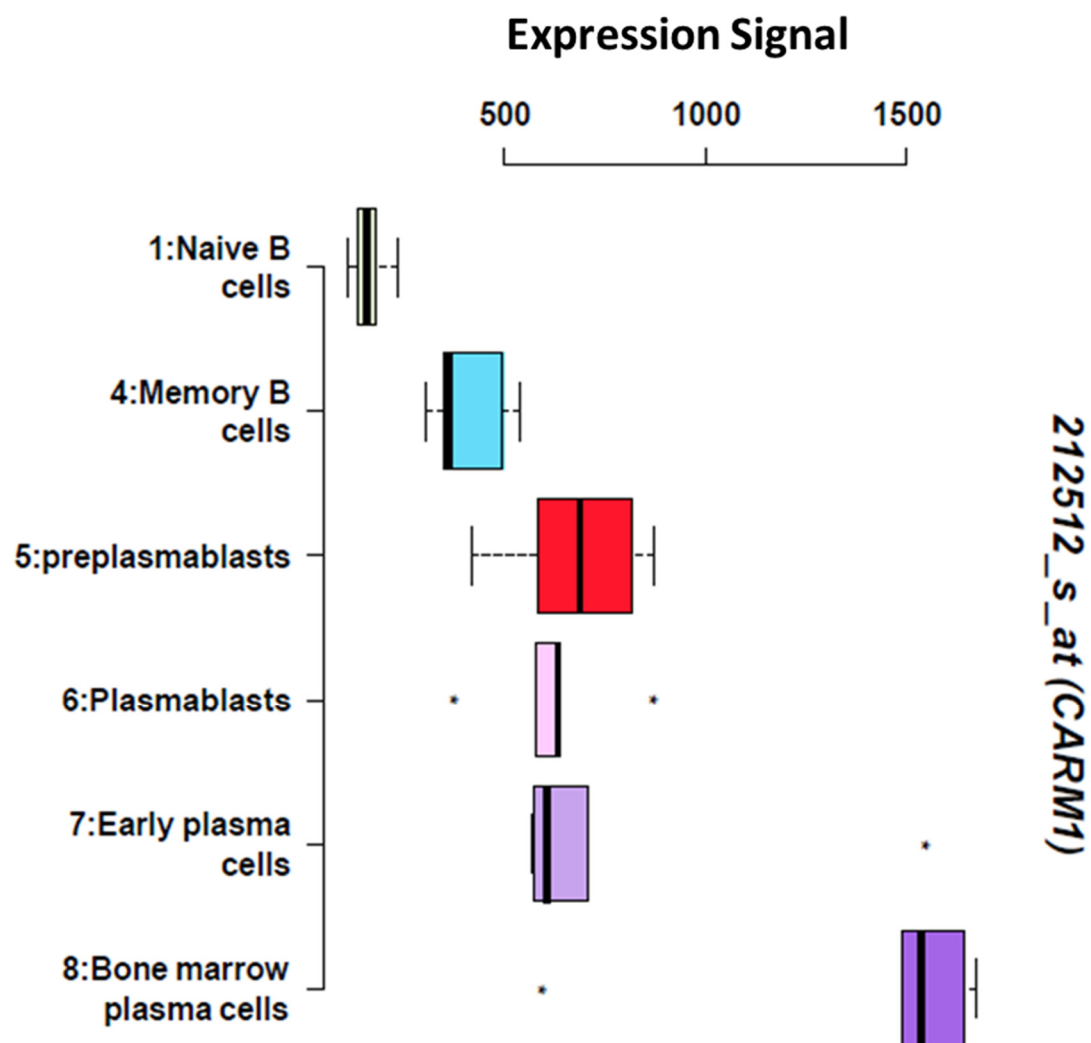

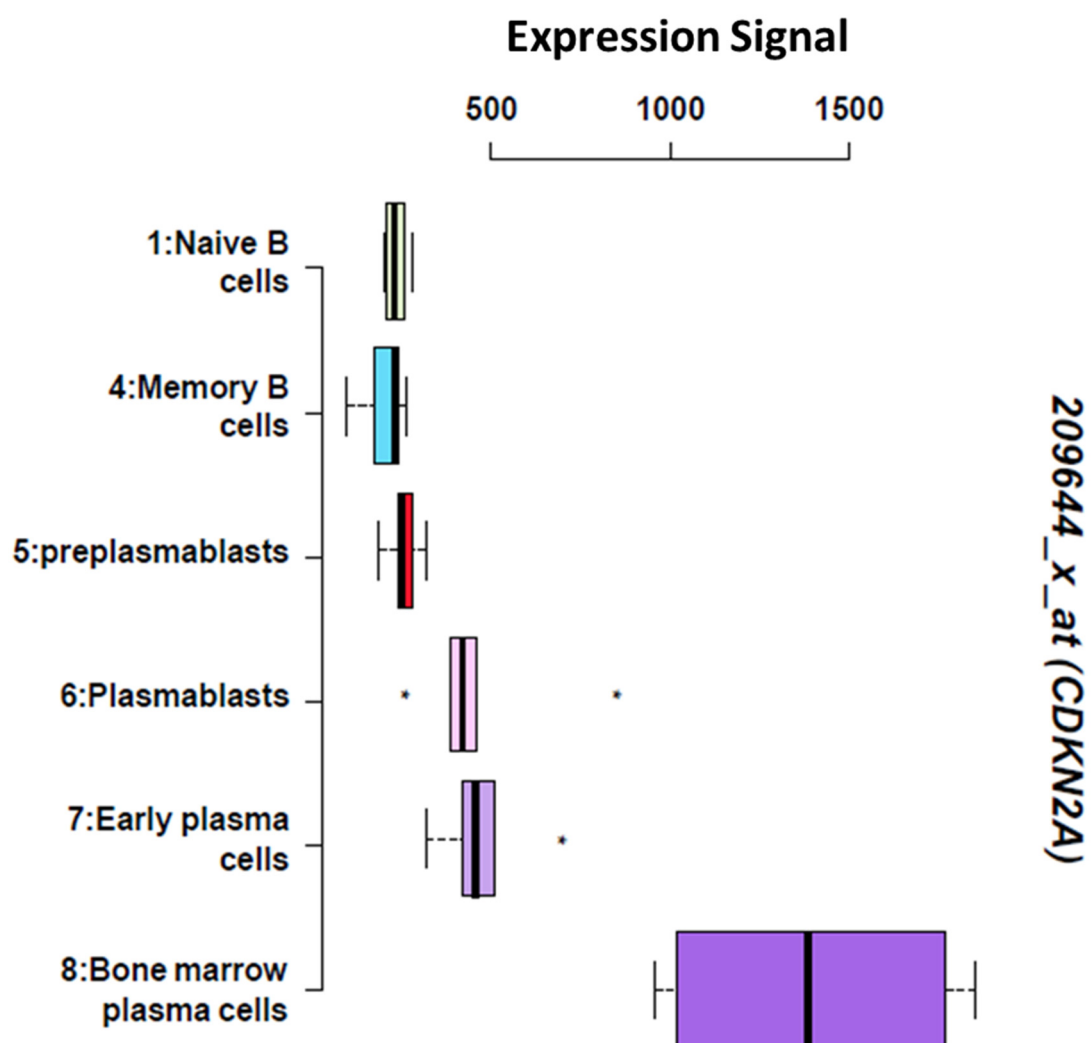

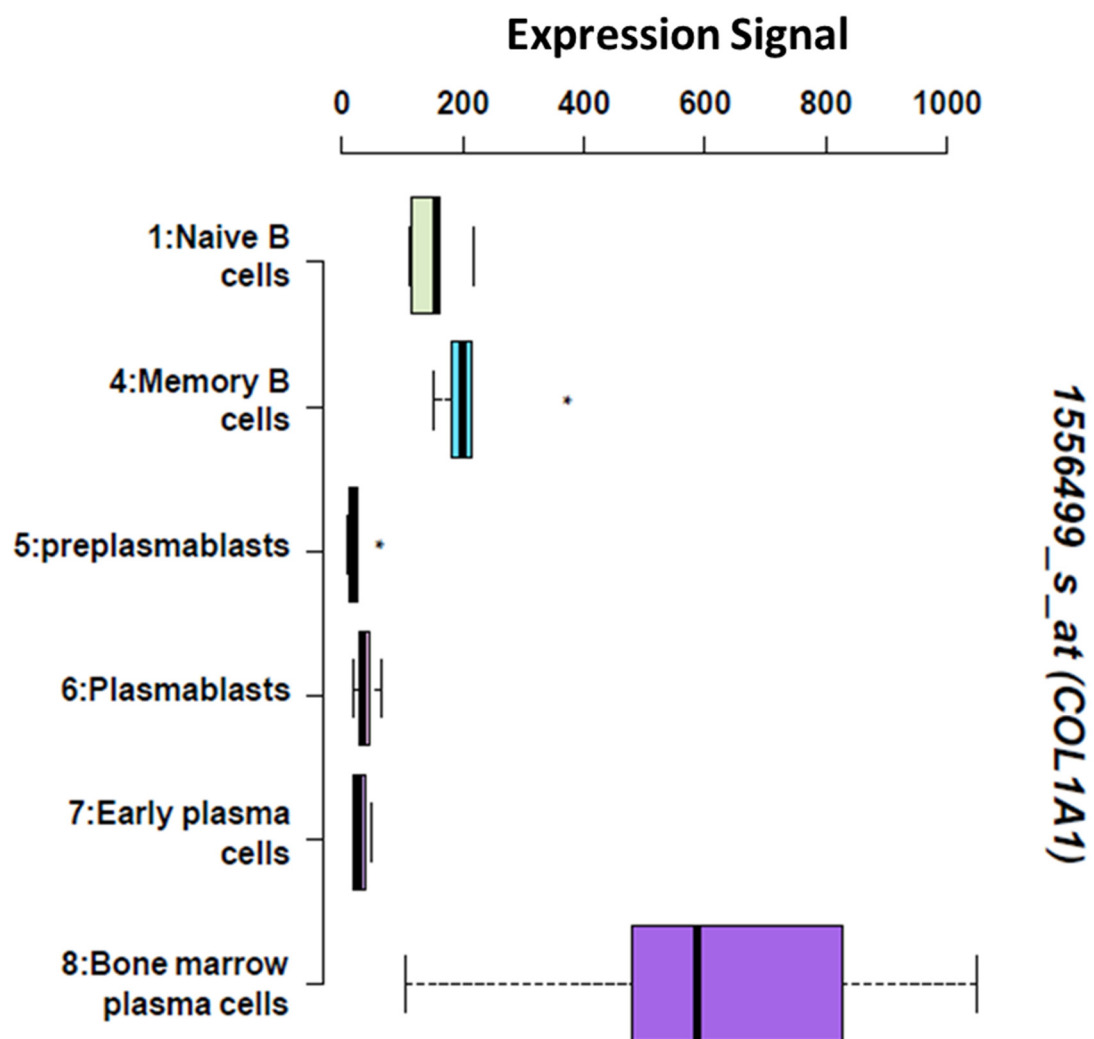

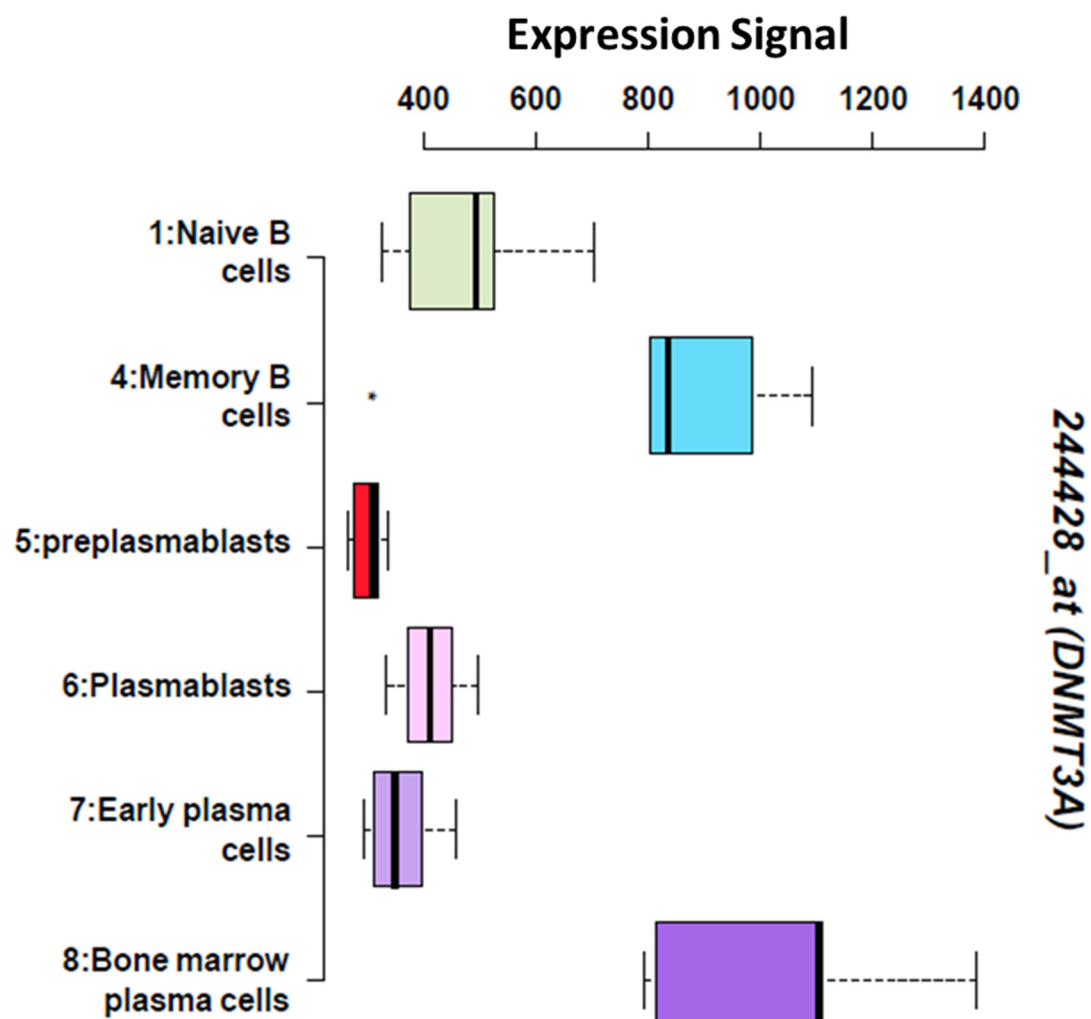

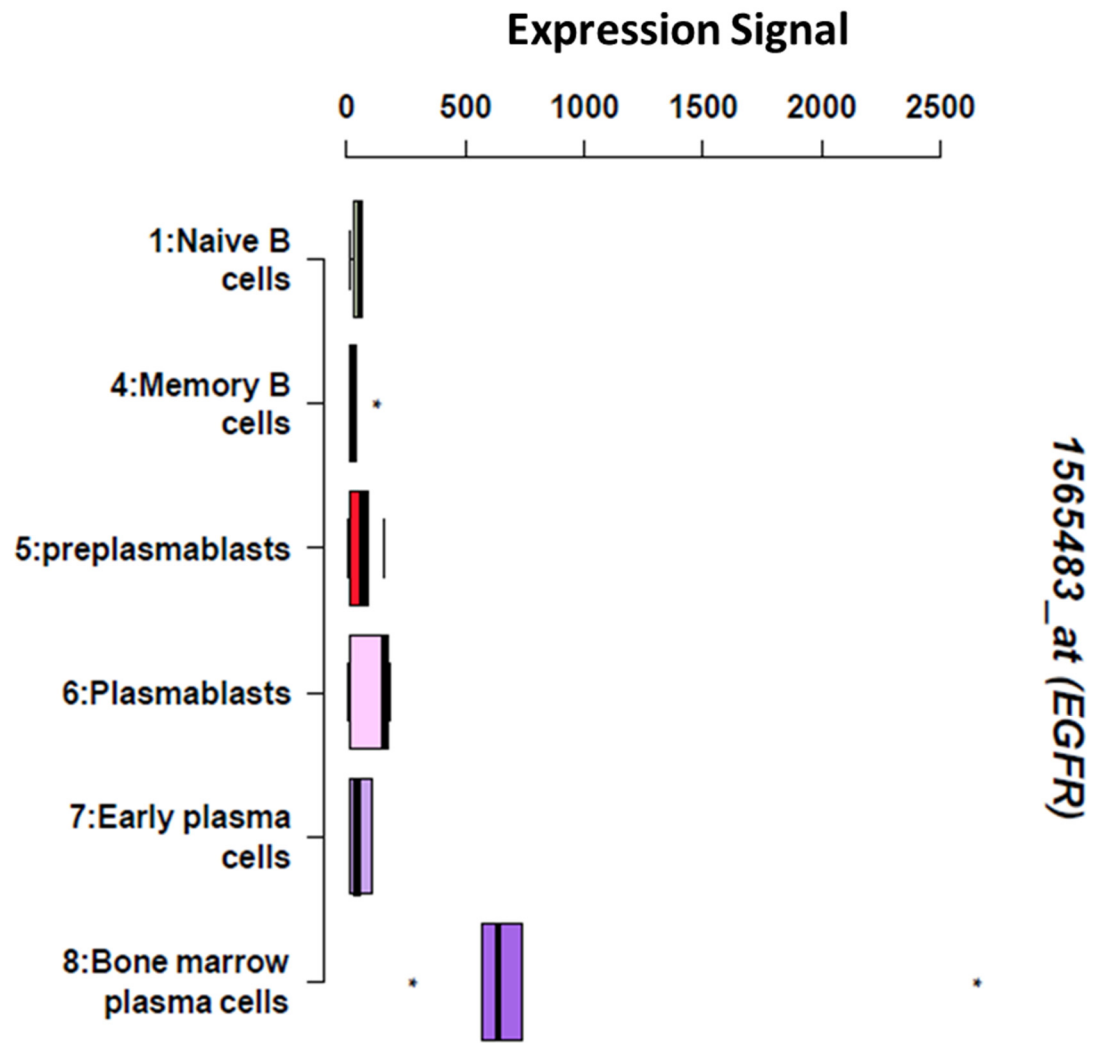

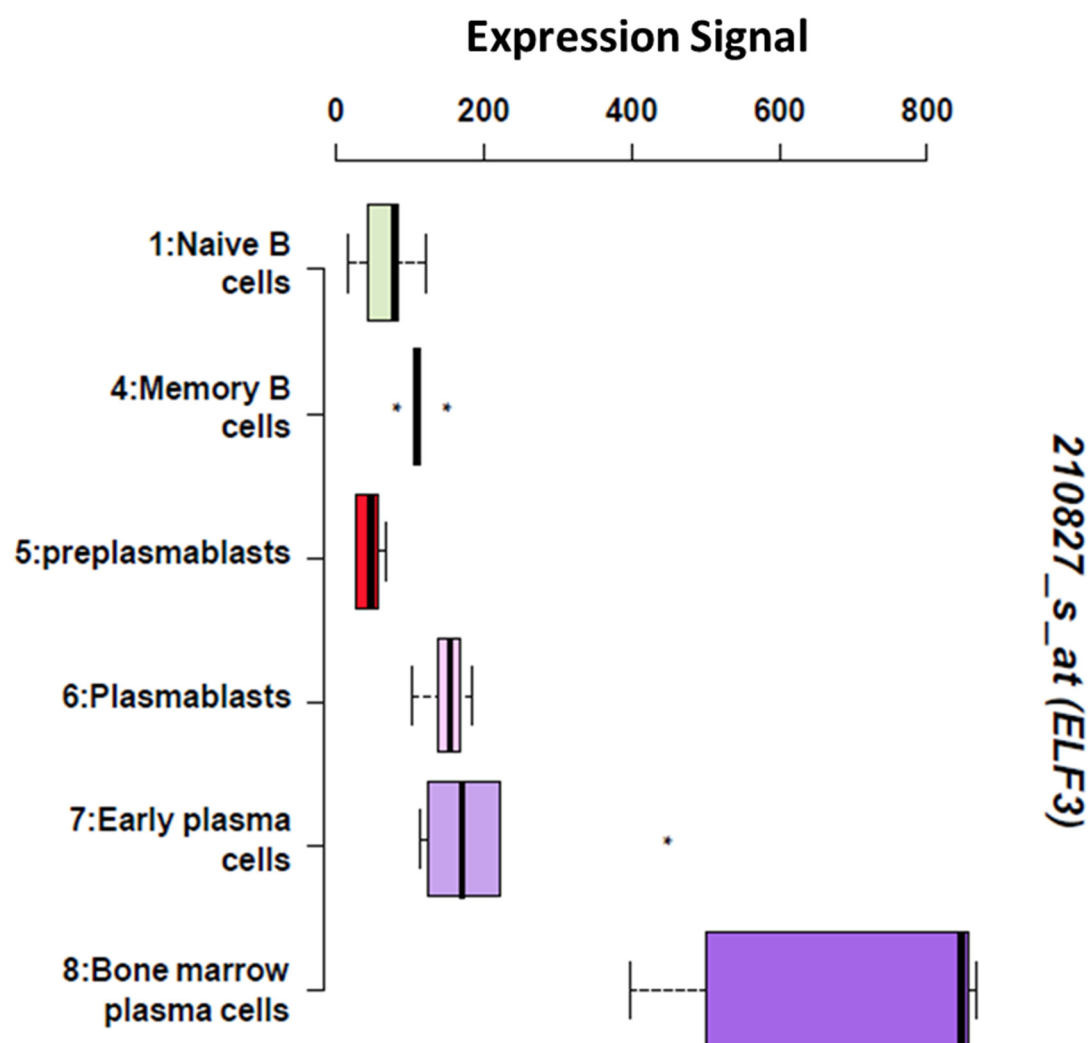

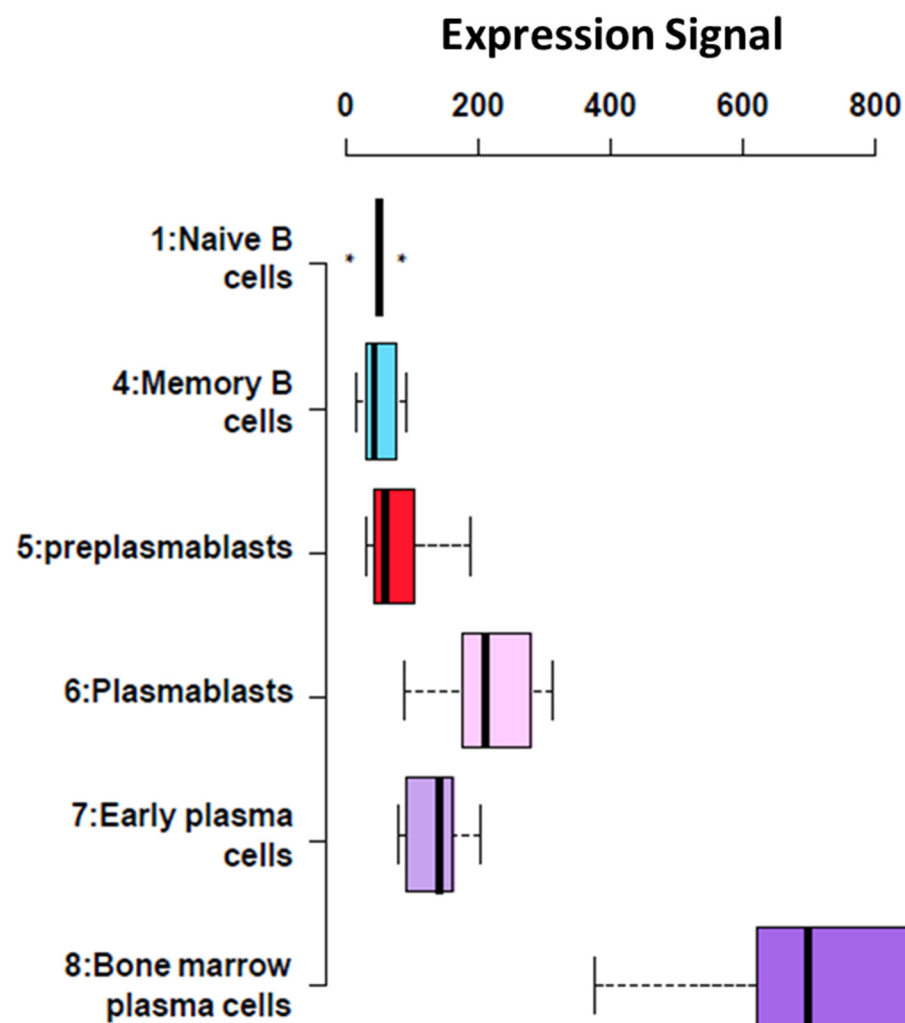

200878\_at (EPAS1)



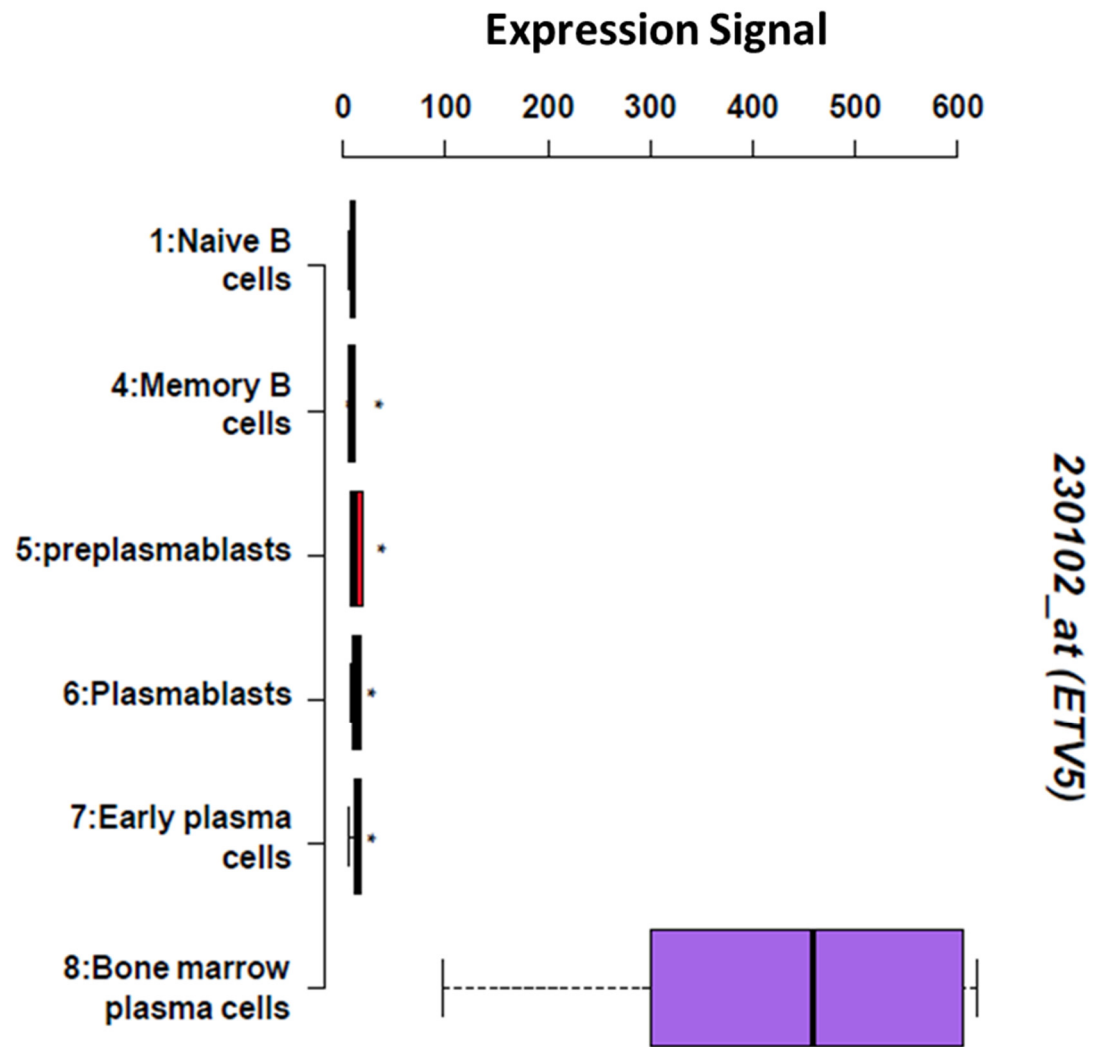

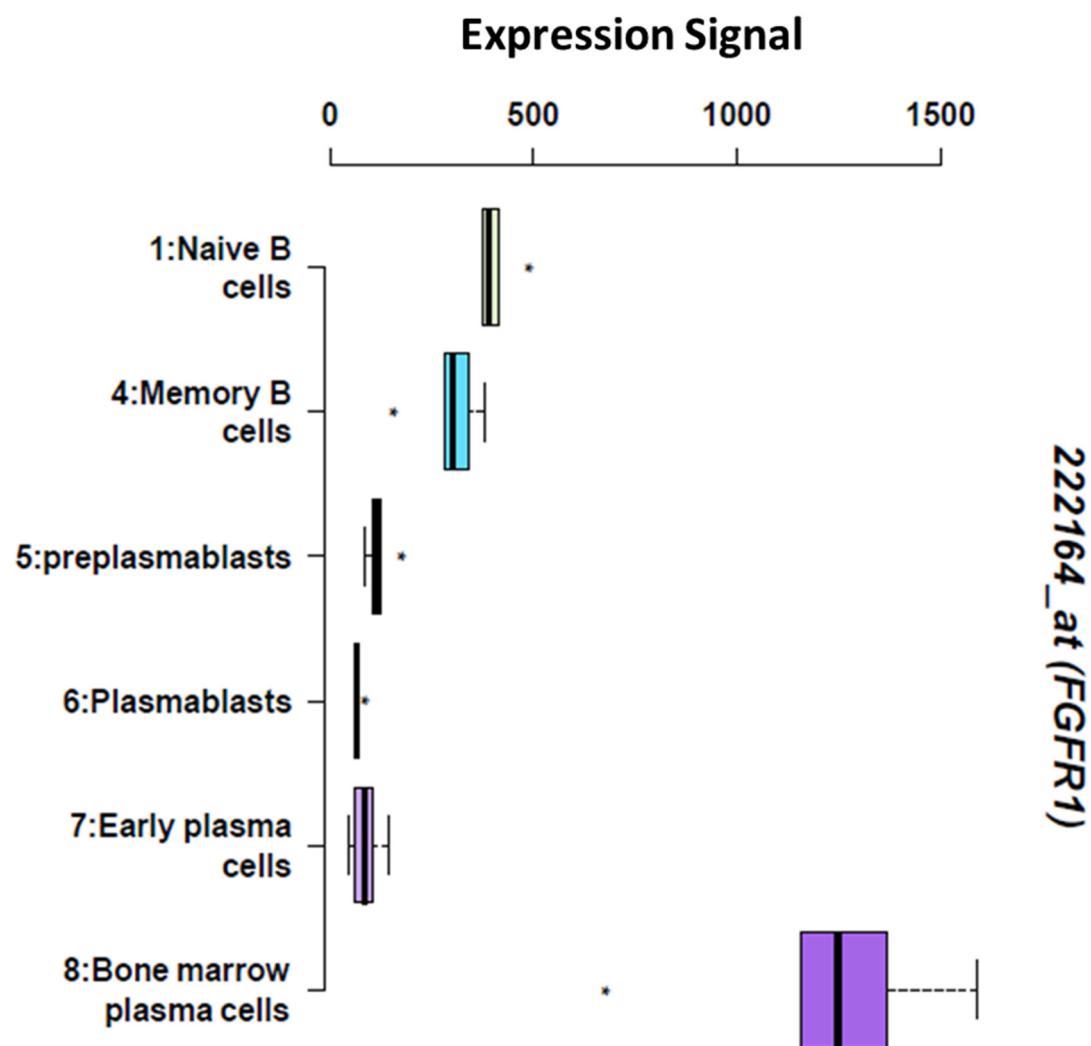

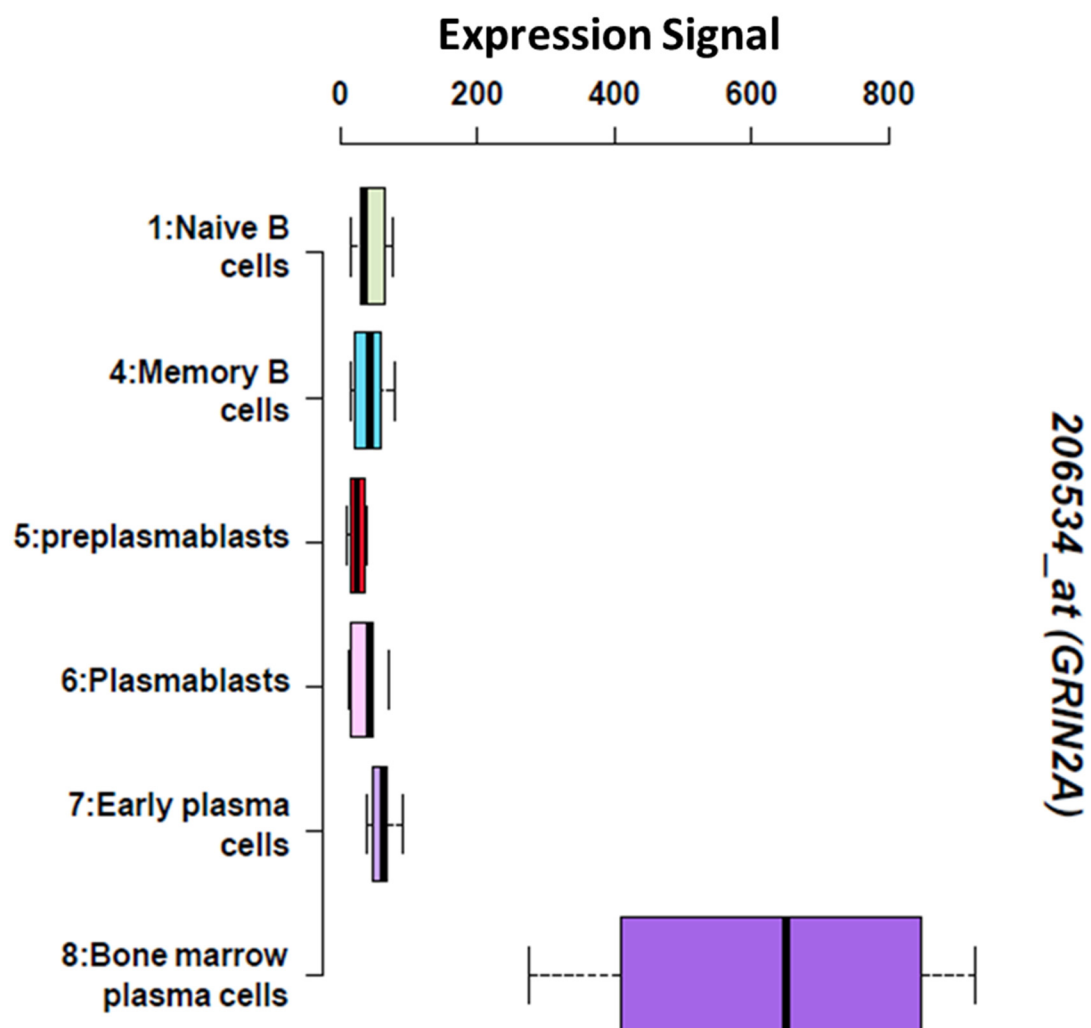

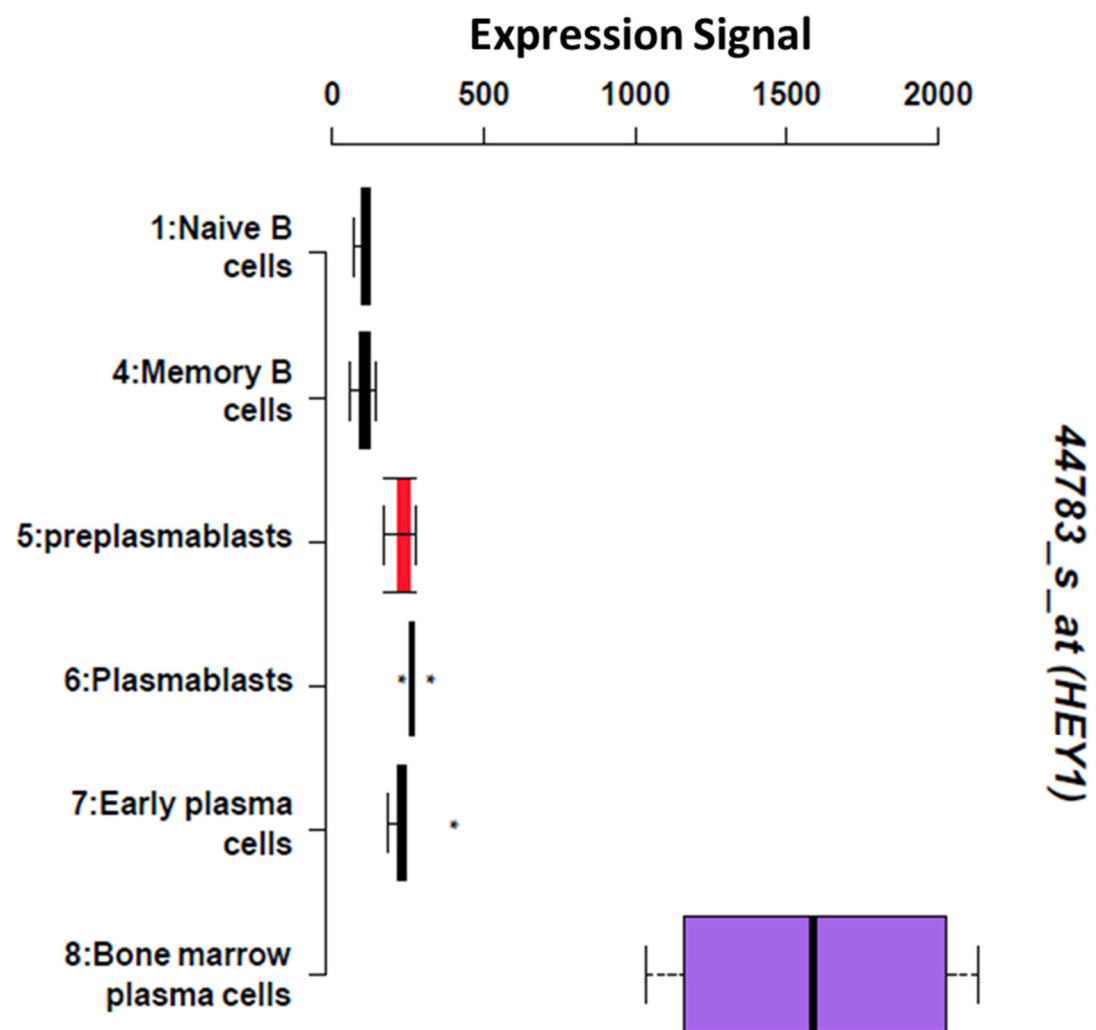

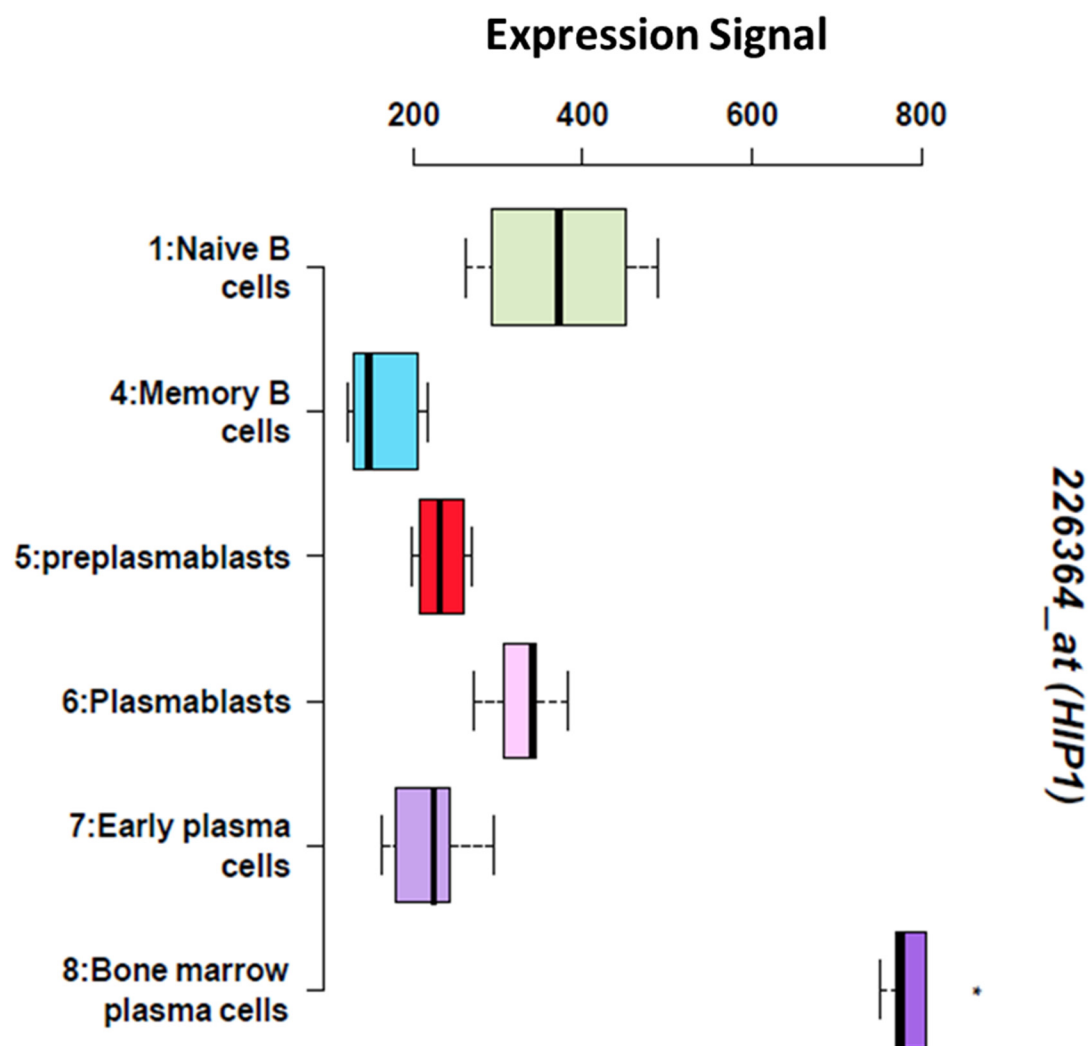

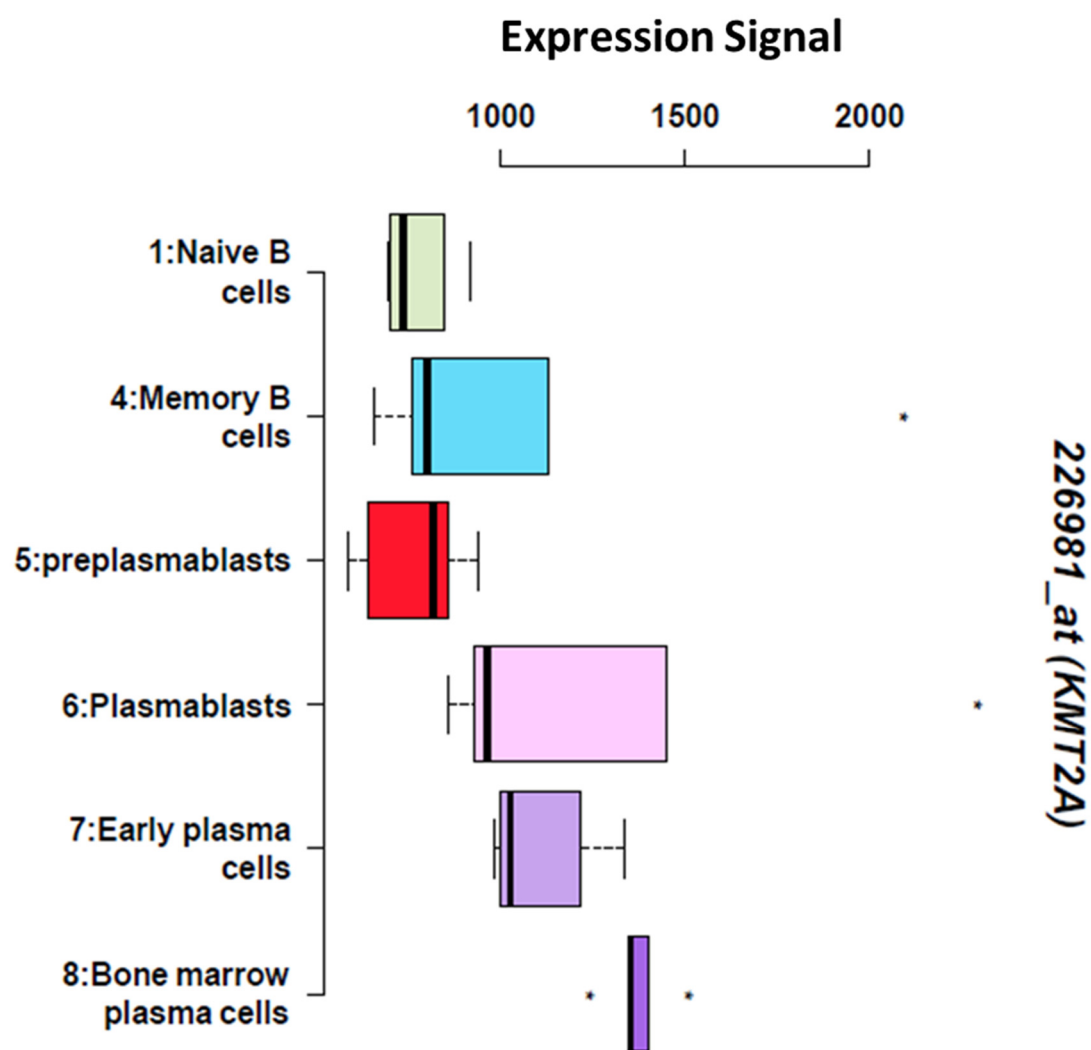

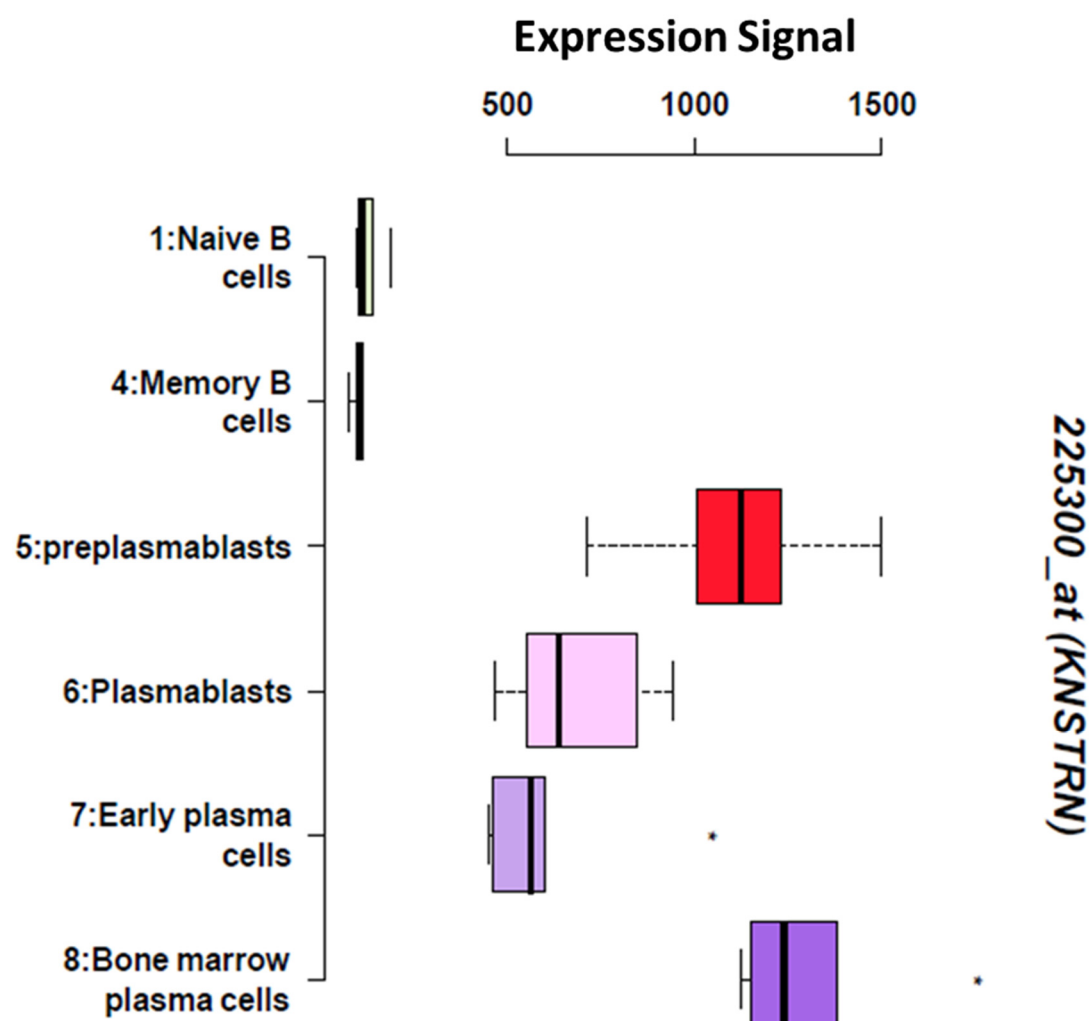

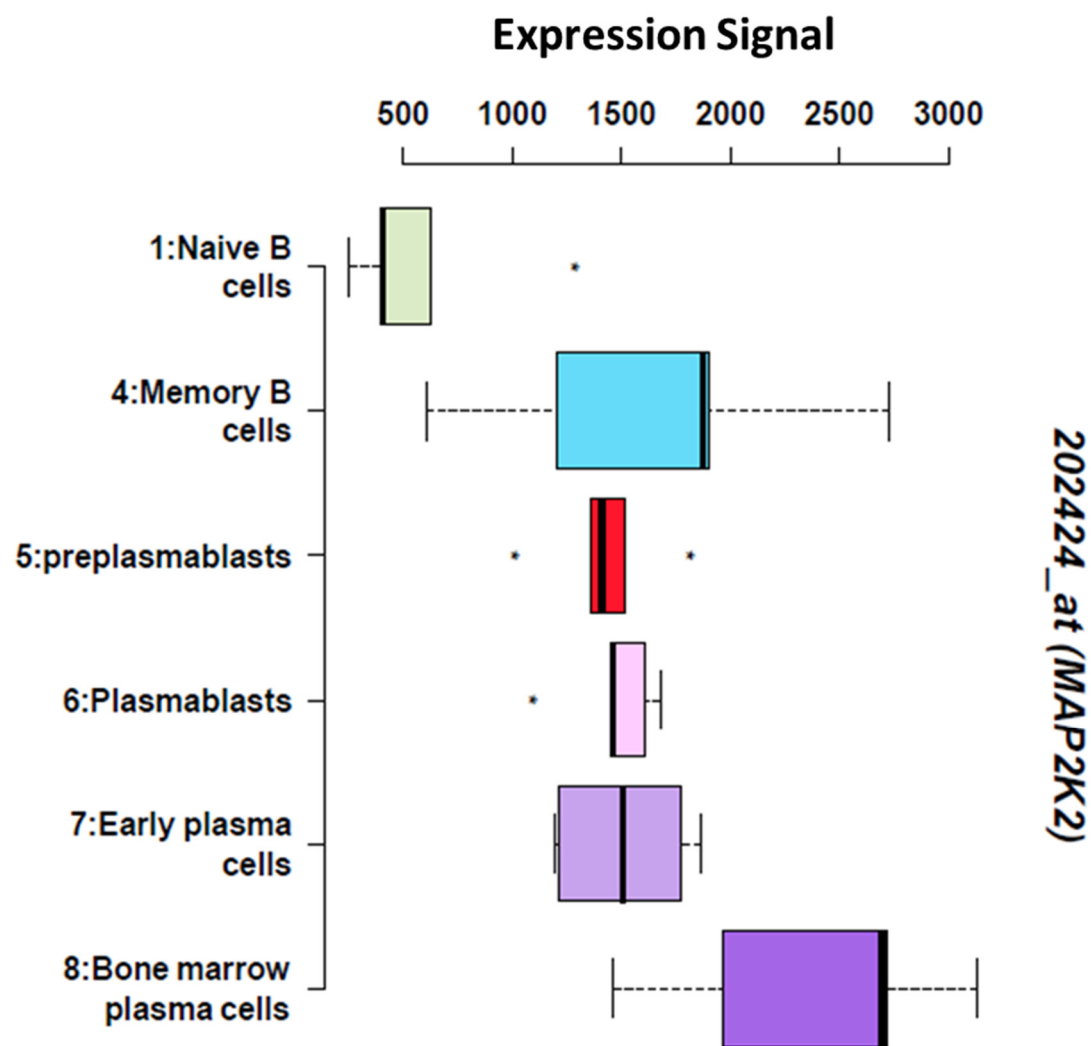



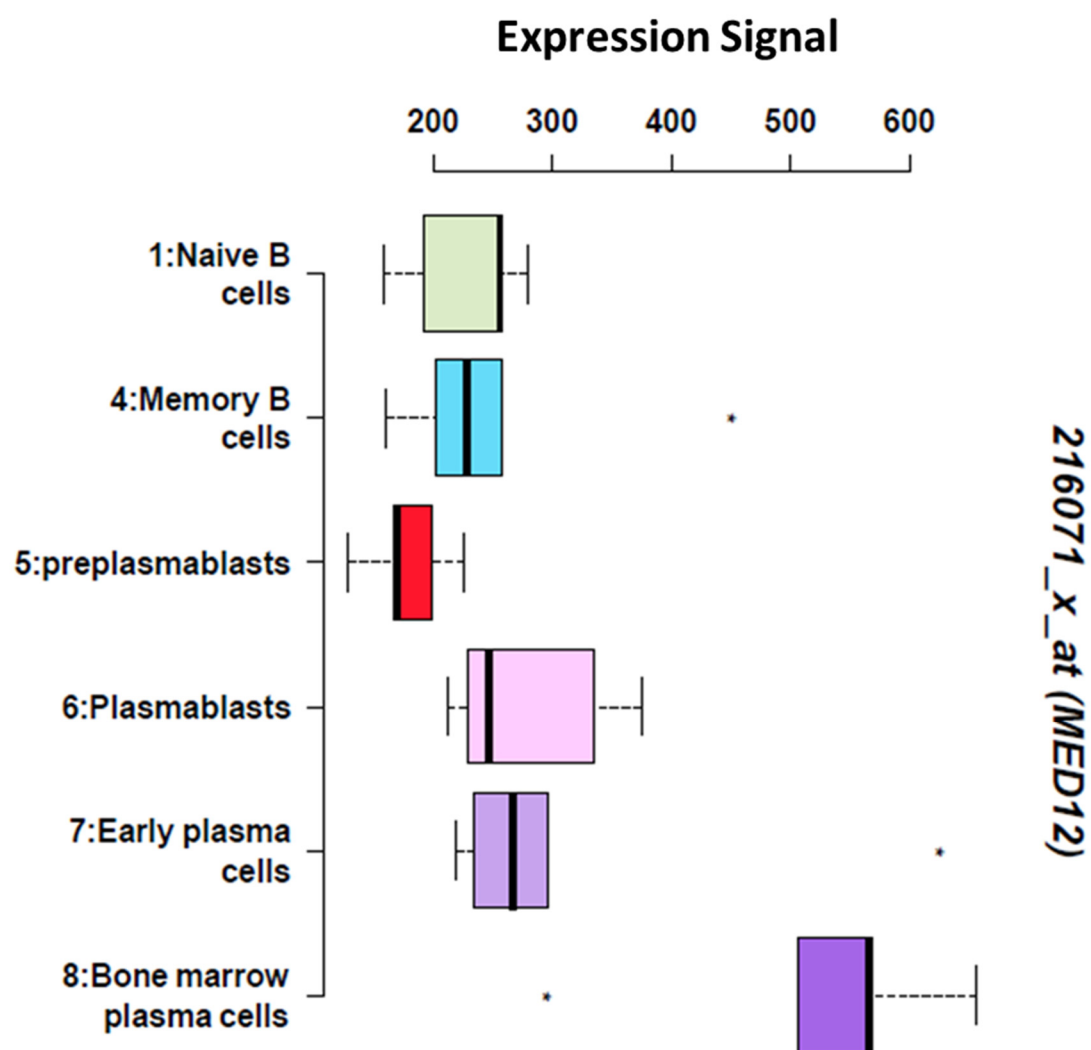

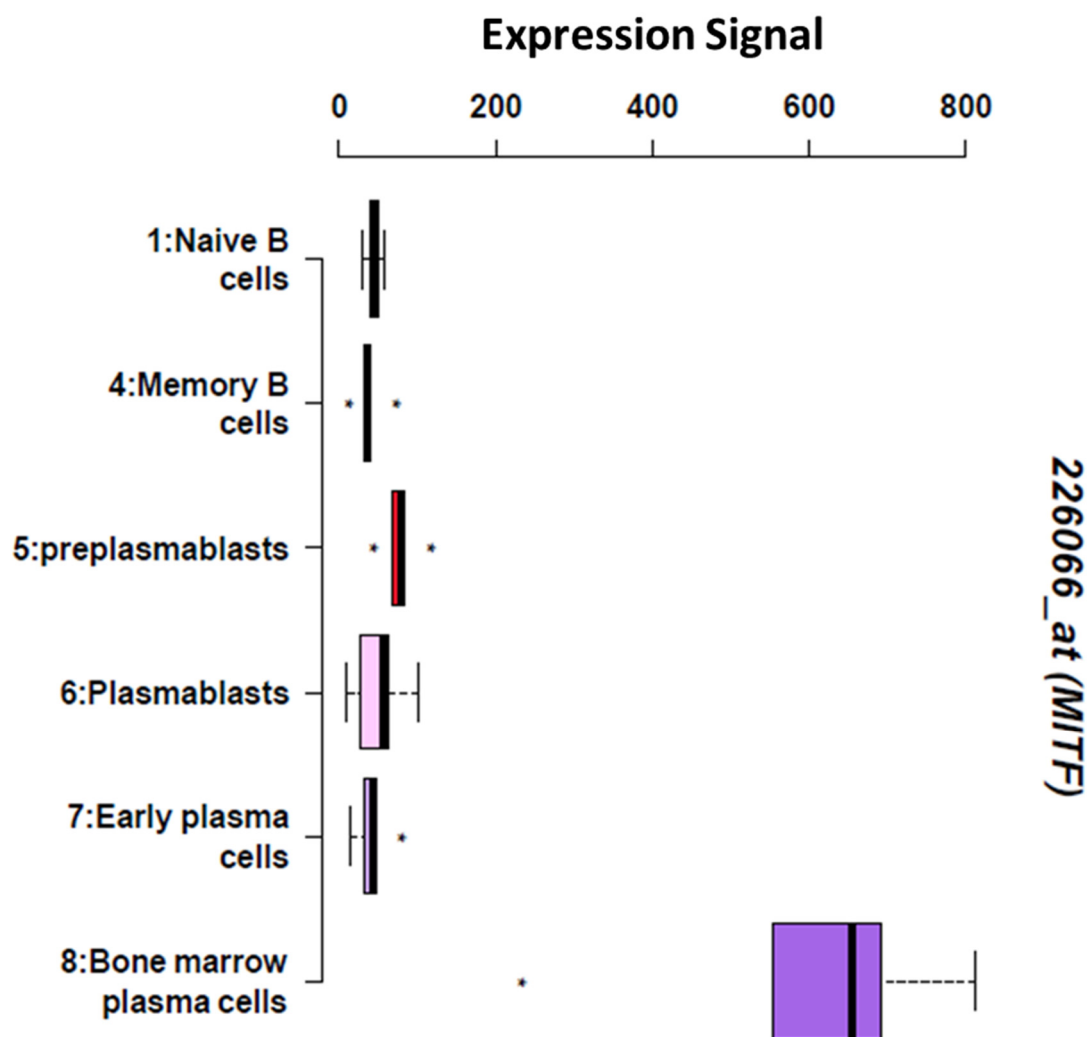

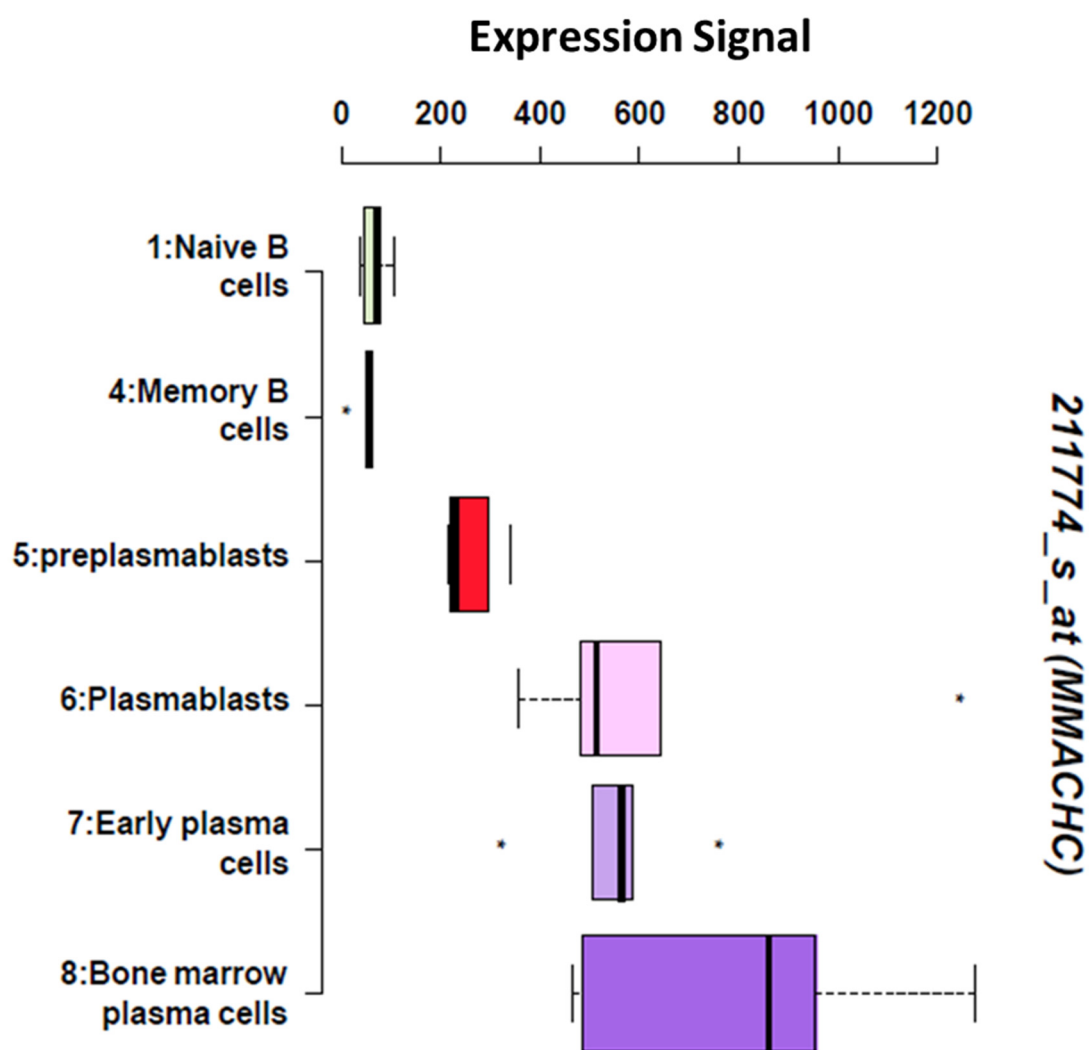

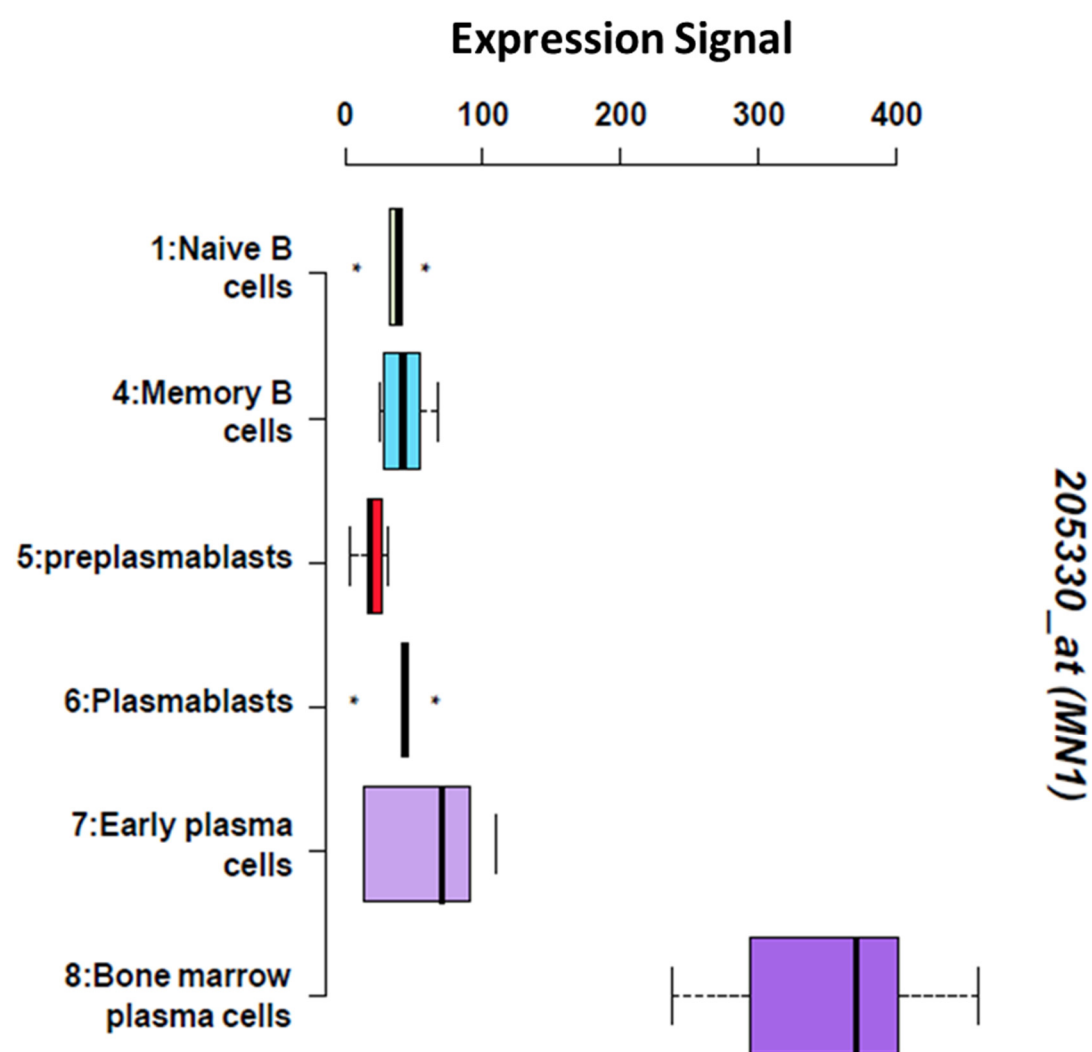

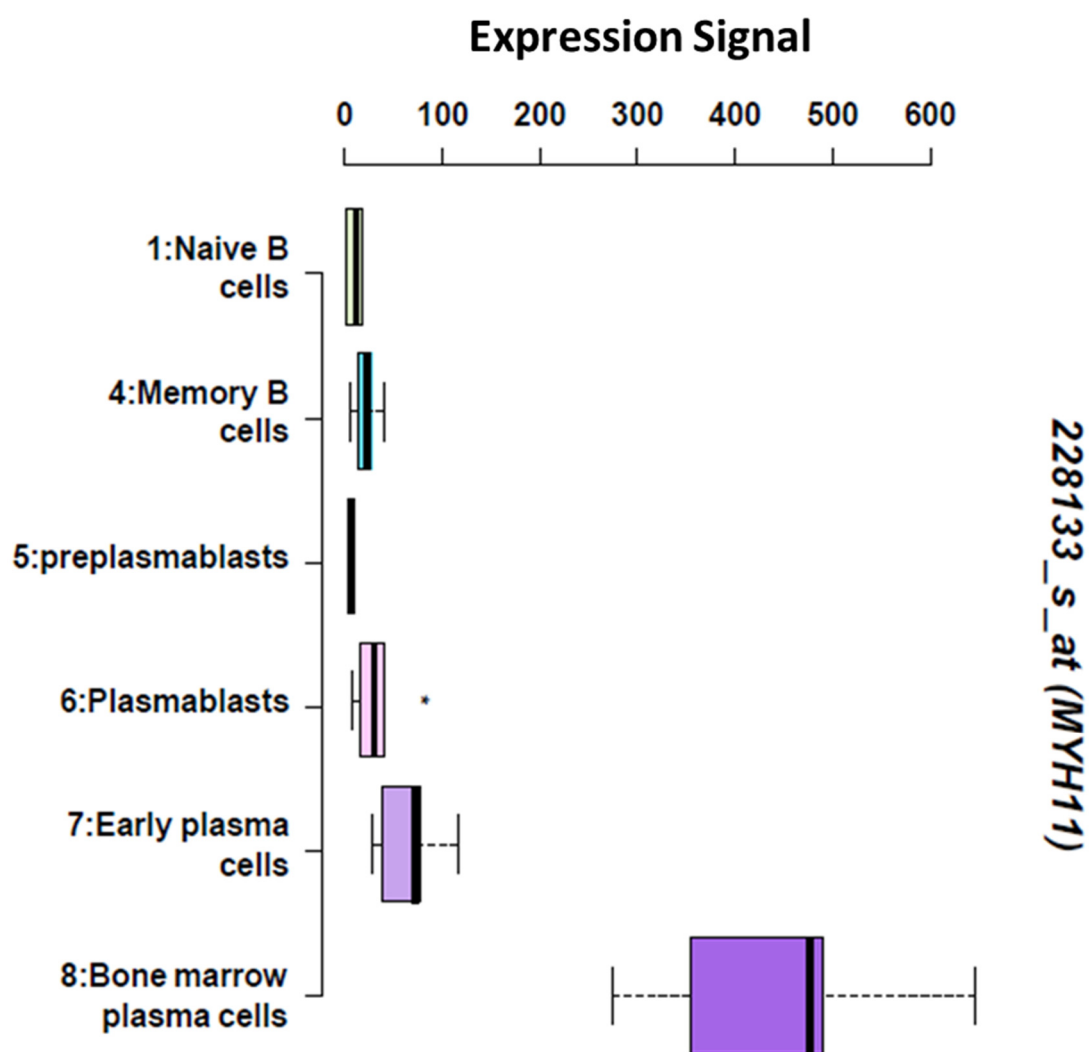

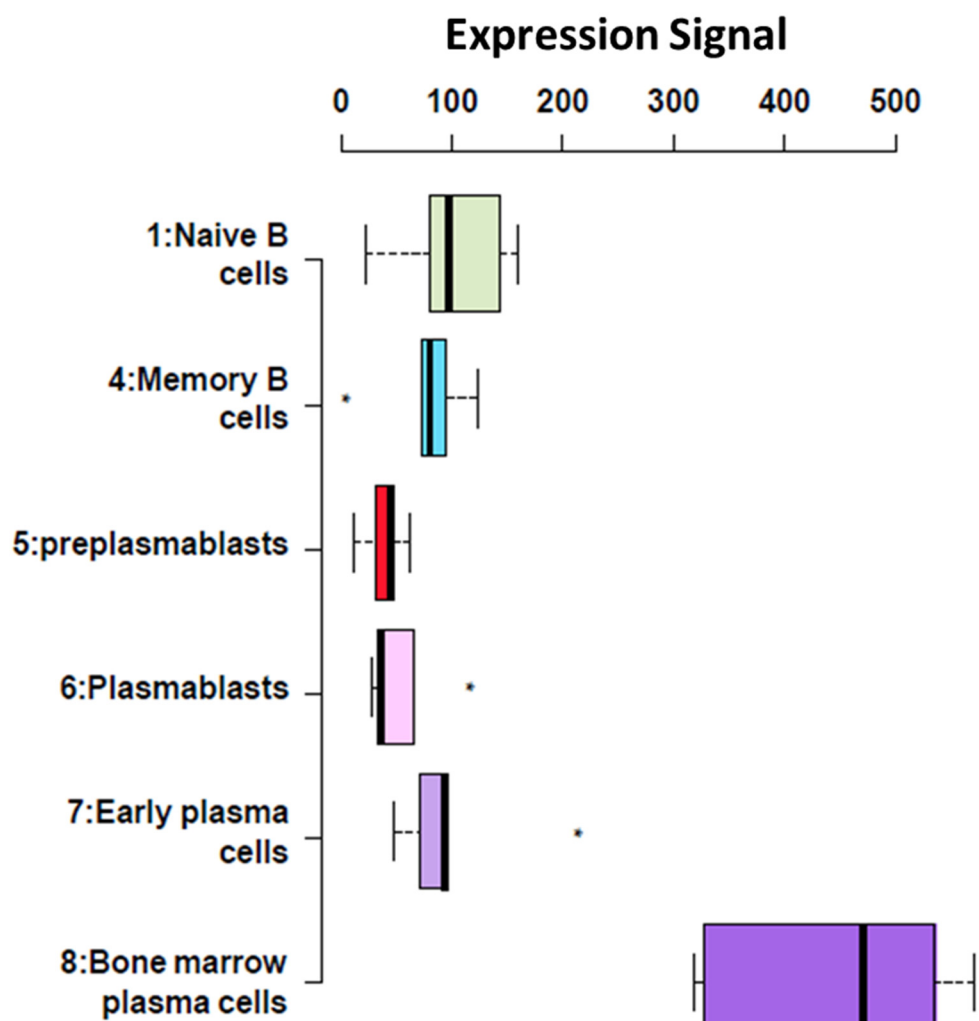

**207152\_at (NTRK2)**

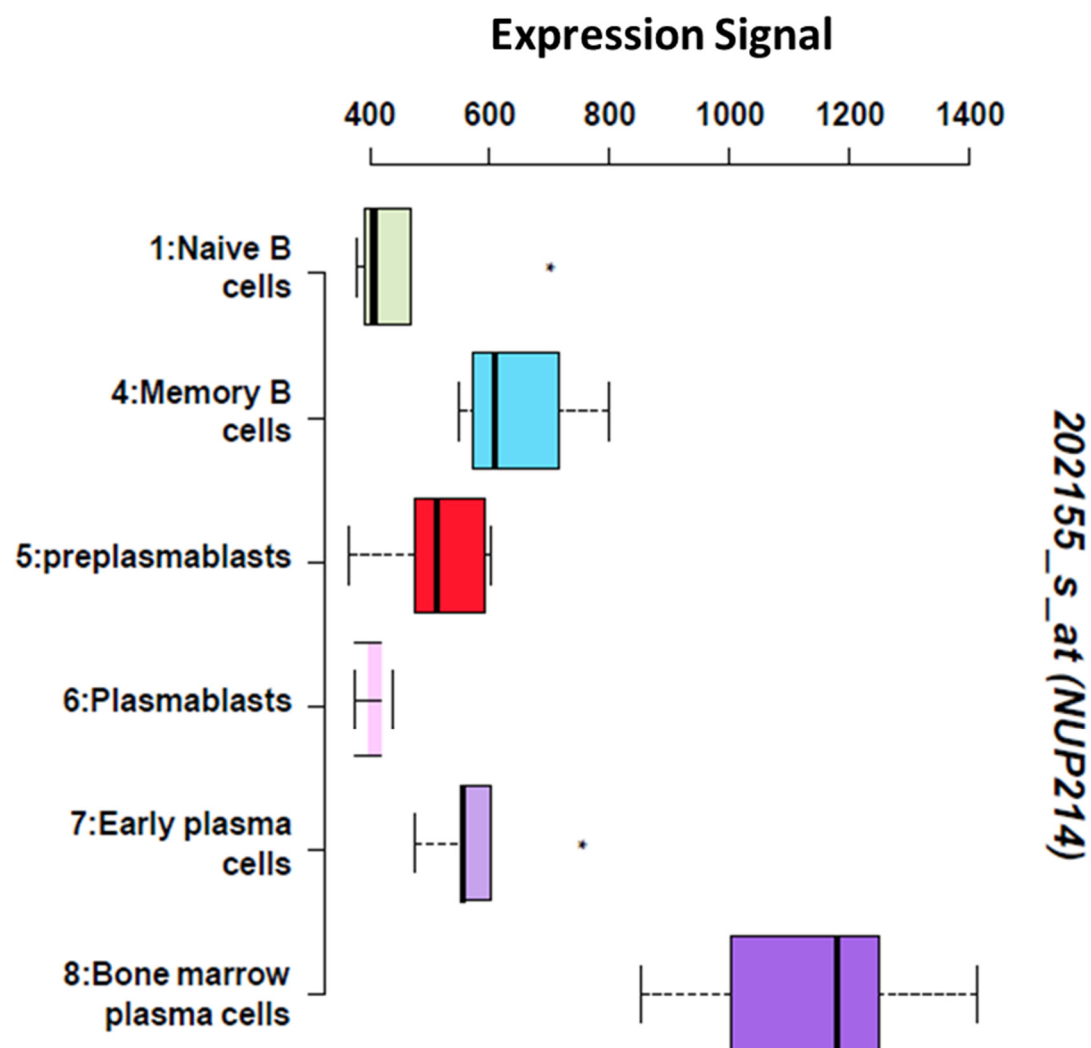

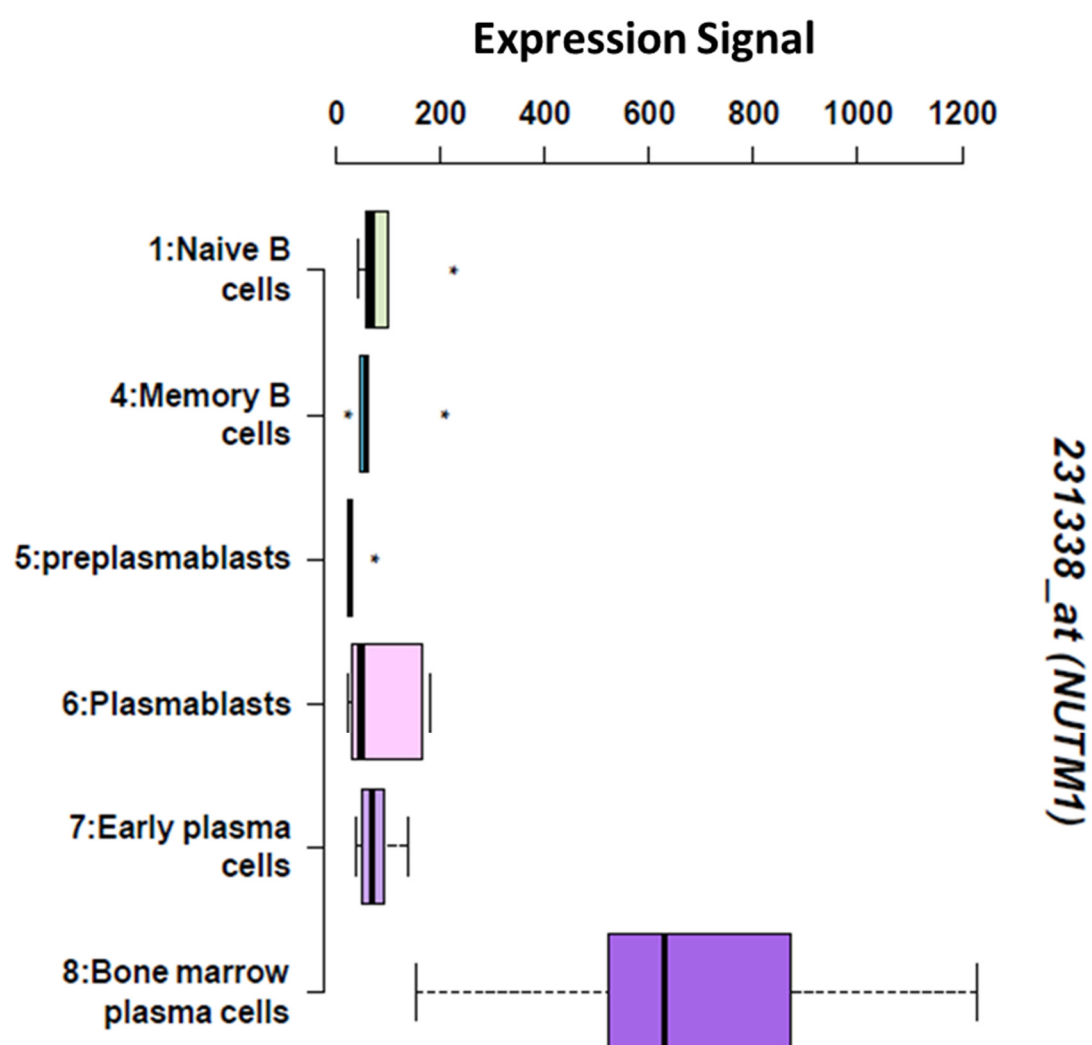



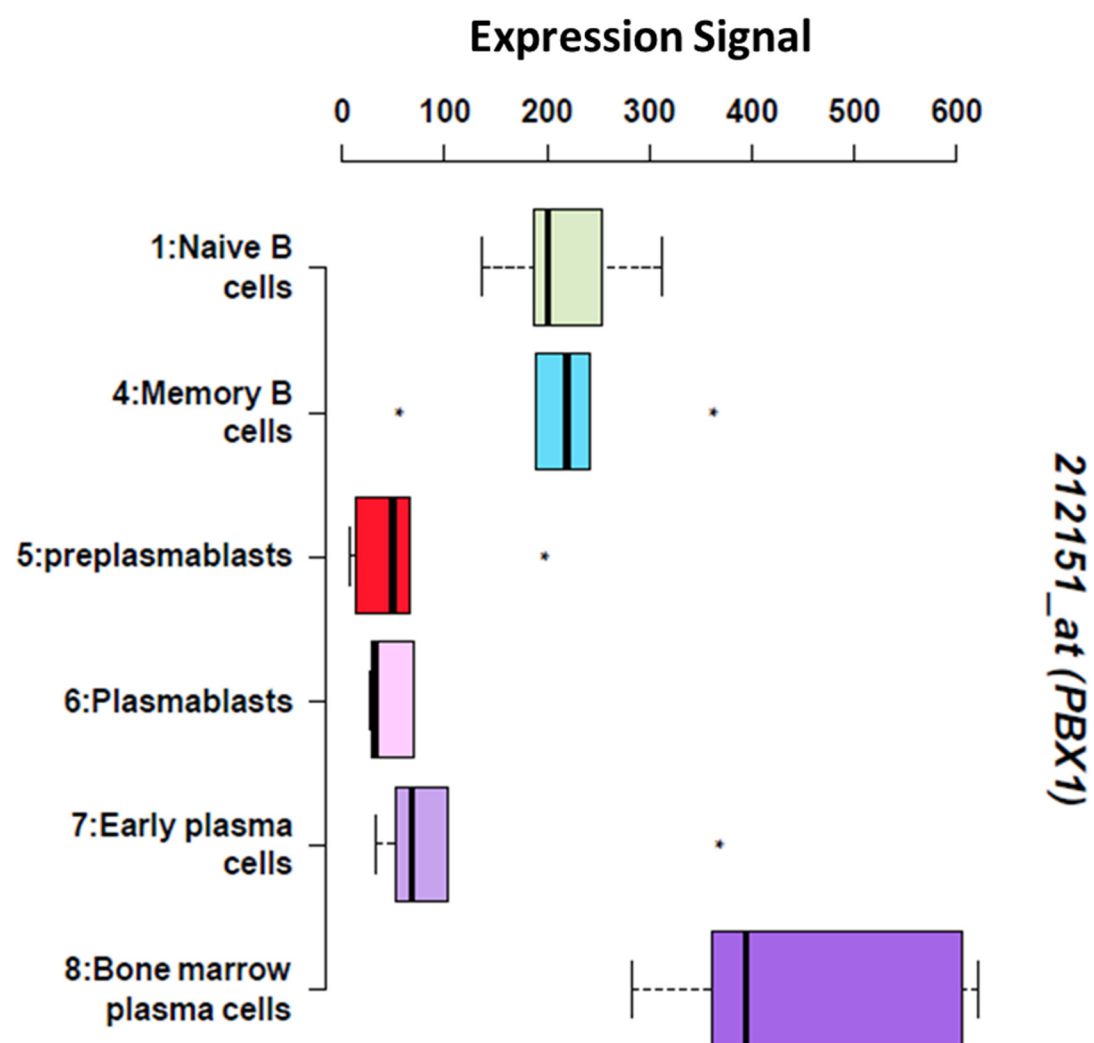

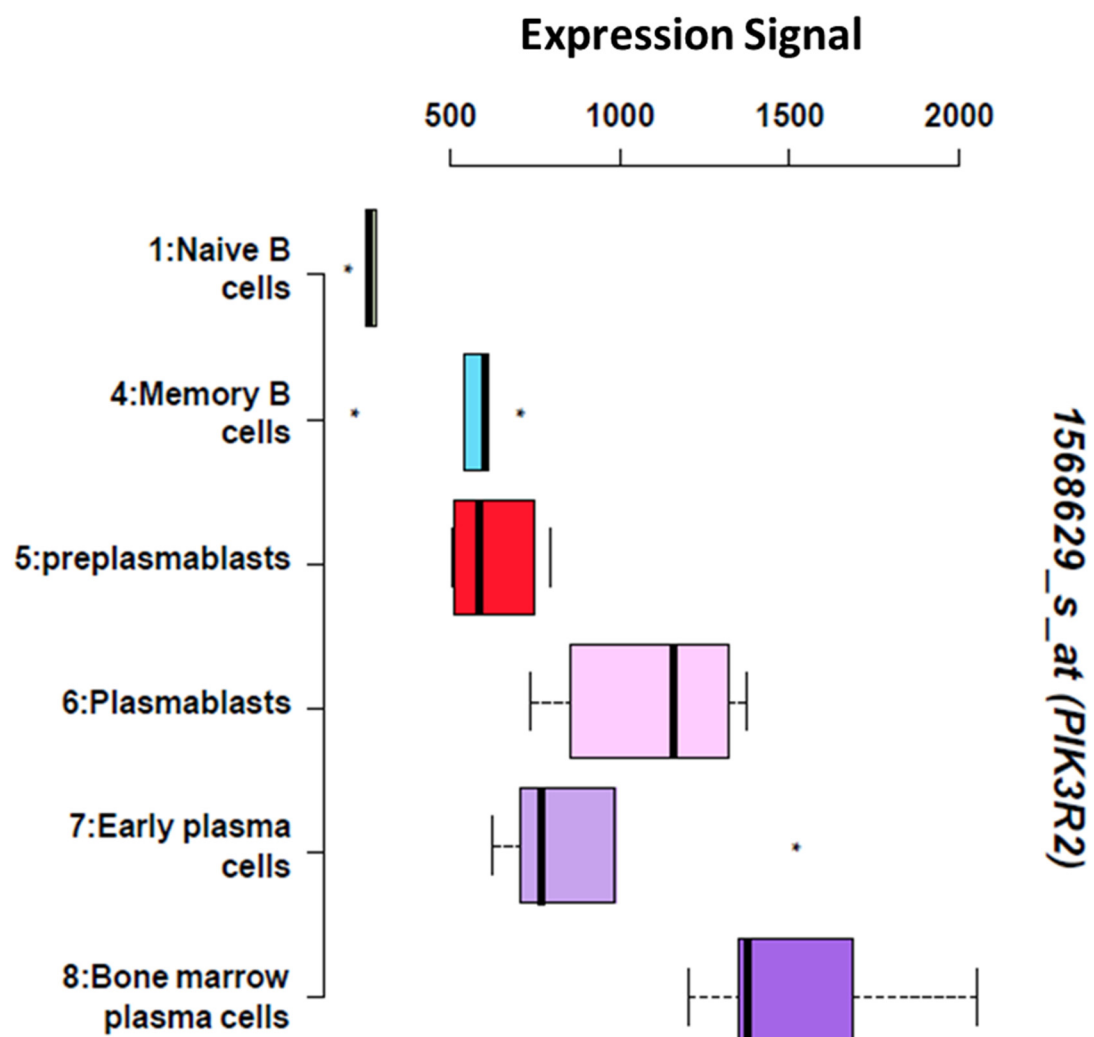

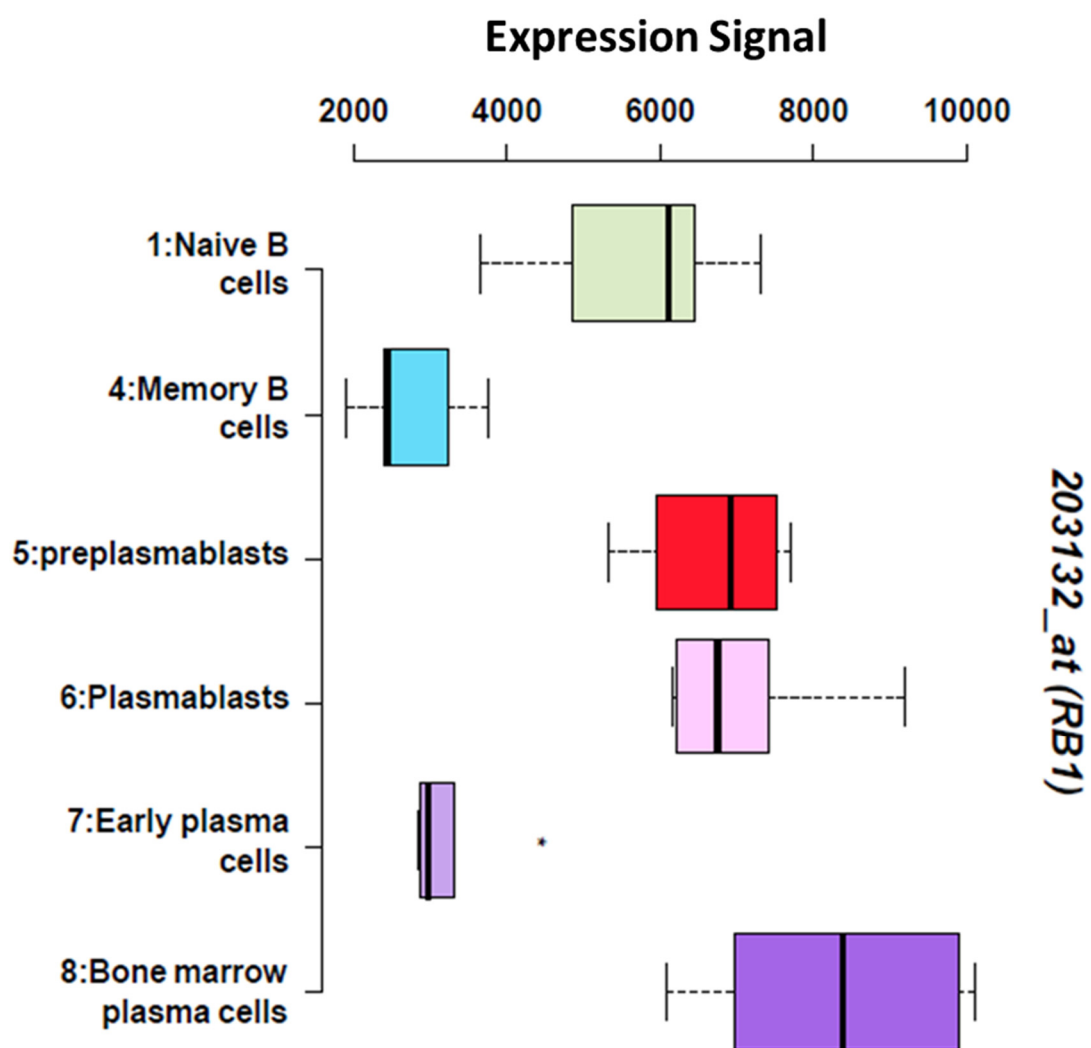

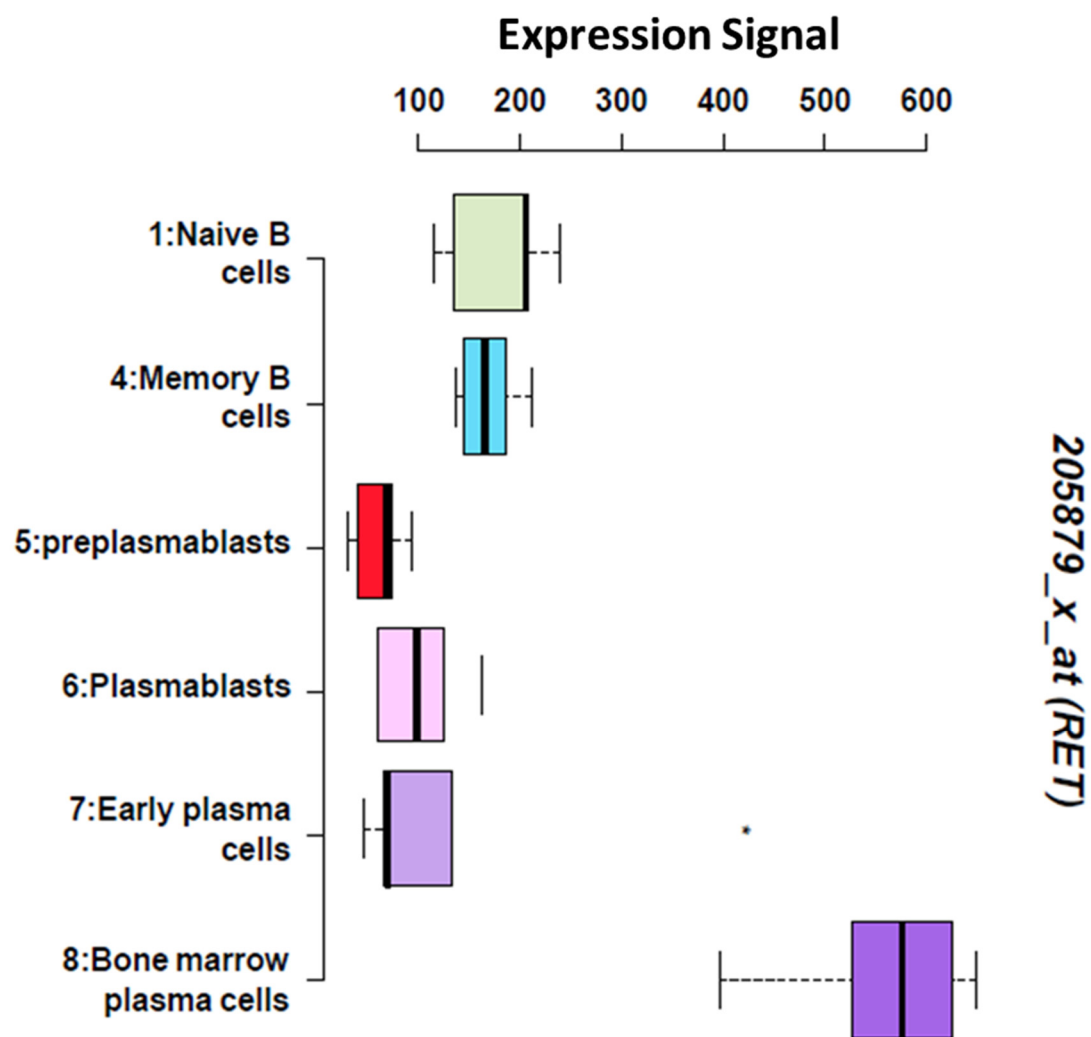

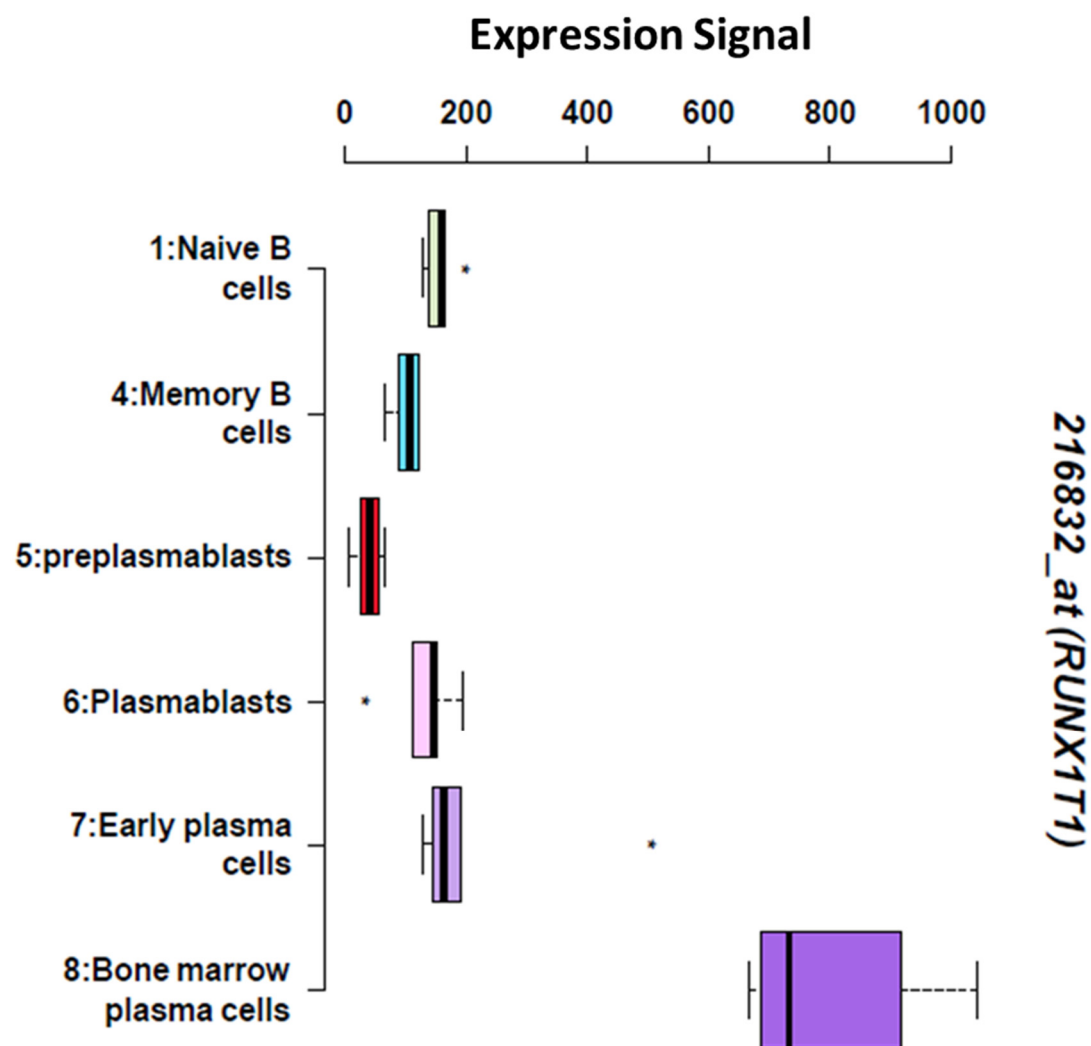

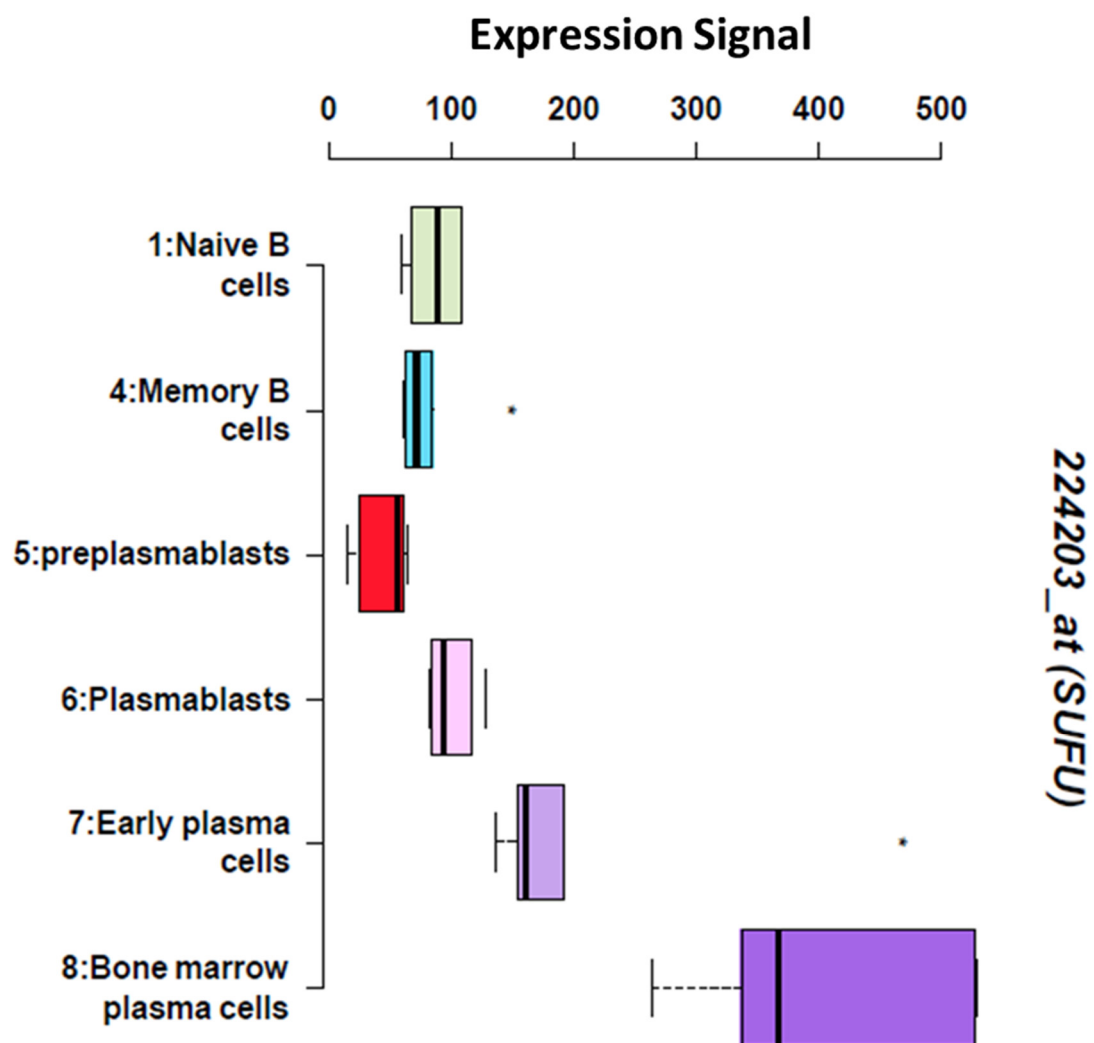

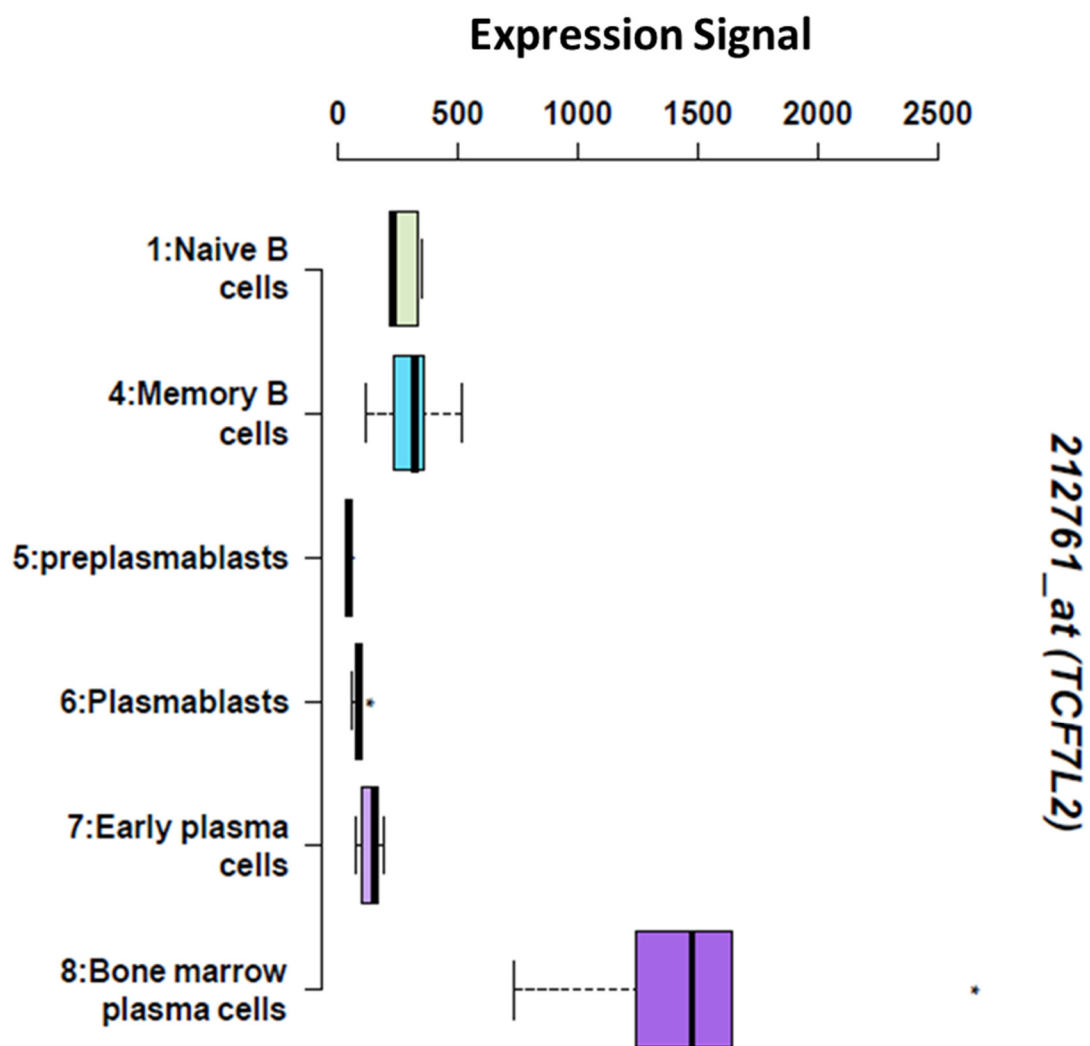

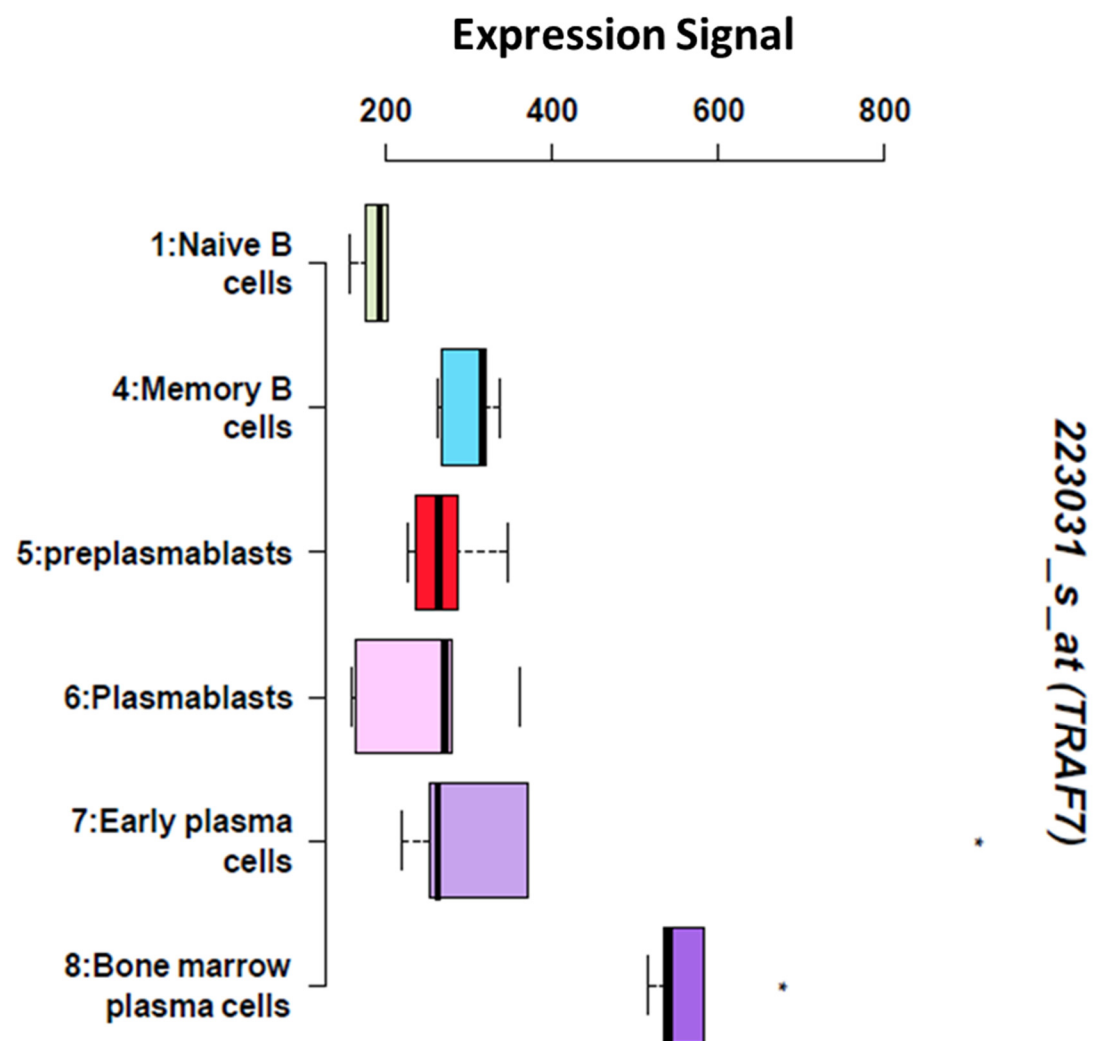



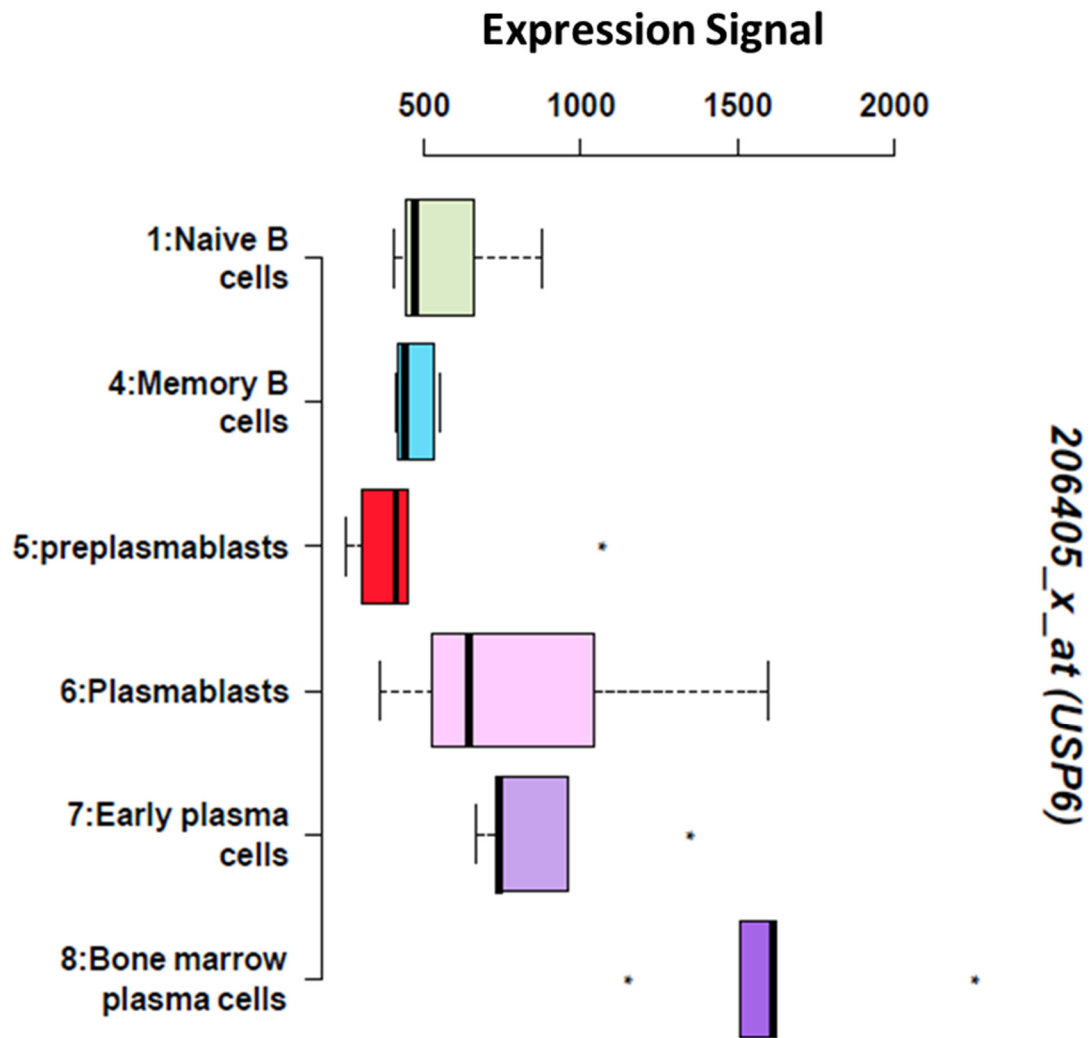

**Figure S1.** 33 genes frequently mutated in MM are overexpressed in bone marrow plasma cells(BMPCs). Expression of 33 genes frequently mutated in MM that are significantly overexpressed in BMPCs, in the different subpopulations of the human plasma cell differentiation. Affymetrix microarrays expression box-plots were defined using GenomicScape web tool (<http://www.genomicscape.com> accessed on 23 July 2021). \* indicates a significant difference using Student's *t*-test ( $p \leq 0.05$ ).

**Table S1.** 83 TRCs resolution genes identified in the literature.

| PROBESET    | NAME    |
|-------------|---------|
| 219841_at   | AICDA   |
| 226320_at   | ALYREF  |
| 1552937_s_a | ATRIP   |
| 205733_at   | BLM     |
| 204531_s_at | BRCA1   |
| 208368_s_at | BRCA2   |
| 235609_at   | BRIP1   |
| 218590_at   | C10orf2 |
| 214426_x_at | CHAF1A  |
| 205394_at   | CHEK1   |
| 202560_s_at | CHTOP   |
| 201241_at   | DDX1    |
| 208159_x_at | DDX11   |
| 202577_s_at | DDX19A  |
| 224654_at   | DDX21   |
| 201440_at   | DDX23   |
| 220890_s_at | DDX47   |
| 225886_at   | DDX5    |
| 223139_s_at | DHX36   |
| 202420_s_at | DHX9    |
| 214194_at   | DIS3    |
| 213647_at   | DNA2    |
| 218482_at   | ENY2    |
| 235399_at   | ERCC2   |
| 202176_at   | ERCC3   |
| 235215_at   | ERCC4   |
| 202414_at   | ERCC5   |
| 204603_at   | EXO1    |
| 207541_s_at | EXOSC10 |
| 209527_at   | EXOSC2  |
| 227916_x_at | EXOSC3  |
| 218481_at   | EXOSC5  |
| 212627_s_at | EXOSC7  |
| 203678_at   | FAN1    |
| 203805_s_at | FANCA   |
| 242560_at   | FANCD2  |
| 213007_at   | FANCI   |
| 234733_s_at | FANCM   |
| 217902_s_at | HERC2   |
| 209330_s_at | HNRNPD  |

**Table S2.** 41 TRCs resolution genes significantly overexpressed in pre-plasmablasts compared to memory B cells, plasmablasts and plasma cells.

| PROBESET    | NAME     |
|-------------|----------|
| 219841_at   | AICDA    |
| 226320_at   | ALYREF   |
| 205733_at   | BLM      |
| 204531_s_at | BRCA1    |
| 235609_at   | BRIP1    |
| 218590_at   | C10orf2  |
| 214426_x_at | CHAF1A   |
| 201241_at   | DDX1     |
| 201440_at   | DDX23    |
| 213647_at   | DNA2     |
| 218482_at   | ENY2     |
| 204603_at   | EXO1     |
| 207541_s_at | EXOSC10  |
| 209527_at   | EXOSC2   |
| 227916_x_at | EXOSC3   |
| 212627_s_at | EXOSC7   |
| 203805_s_at | FANCA    |
| 242560_at   | FANCD2   |
| 213007_at   | FANCI    |
| 209330_s_at | HNRNPD   |
| 200594_x_at | HNRNPU   |
| 205395_s_at | MRE11A   |
| 219940_s_at | PCID2    |
| 201202_at   | PCNA     |
| 228252_at   | PIF1     |
| 204354_at   | POT1     |
| 217786_at   | PRMT5    |
| 208393_s_at | RAD50    |
| 203344_s_at | RBBP8    |
| 212917_x_at | RECQL    |
| 218497_s_at | RNASEH1  |
| 203022_at   | RNASEH2A |
| 201528_at   | RPA1     |
| 227447_at   | SKIV2L2  |
| 201742_x_at | SRSF1    |
| 204064_at   | THOC1    |
| 209418_s_at | THOC5    |
| 218848_at   | THOC6    |
| 203046_s_at | TIMELESS |
| 205672_at   | XPA      |
| 223002_s_at | XRN2     |
